# Supplementary material for: Causal relationship between genetically predicted depression and cancer risk: a two-sample bi-directional mendelian randomization
Source: Springer Nature journal article supplement (doi:10.1186/s12885-022-09457-9), 2022-03-31
Supplement: MOESM1 [file 20272130]

Supplementary Figures

Figure S1: Scatter plot of the causal effect of depression on different types of cancer, with the slope of each line corresponding to estimated causal effect per method ..... 4

Figure S2: Funnel plot of the causal effect of depression on different types of cancer..... 6

Figure S3: Scatter plot of the causal effect of different types of cancer on depression, with the slope of each line corresponding to estimated causal effect per method ..... 8

Figure S4: Funnel plot of the causal effect of different types of cancer on depression..... 9

Figure S5: Leave-one-out inverse-variance weighted mendelian randomization analyses of depression on Breast cancer ..... 10

Figure S6: Leave-one-out inverse-variance weighted mendelian randomization analyses of depression on ER+ Breast cancer ..... 11

Figure S7: Leave-one-out inverse-variance weighted mendelian randomization analyses of depression on ER- Breast cancer ..... 12

Figure S8: Leave-one-out inverse-variance weighted mendelian randomization analyses of depression on Ovarian cancer ..... 13

Figure S9: Leave-one-out inverse-variance weighted mendelian randomization analyses of depression on High grade serous ovarian cancer..... 14

Figure S10: Leave-one-out inverse-variance weighted mendelian randomization analyses of depression on Low grade serous ovarian cancer ..... 15

Figure S11: Leave-one-out inverse-variance weighted mendelian randomization analyses of depression on Invasive mucinous ovarian cancer..... 16

Figure S12: Leave-one-out inverse-variance weighted mendelian randomization analyses of depression on Clear cell ovarian cancer ..... 17

Figure S13: Leave-one-out inverse-variance weighted mendelian randomization analyses of depression on Endometrioid ovarian cancer..... 18

Figure S14: Leave-one-out inverse-variance weighted mendelian randomization analyses of depression on High grade and low grade serous ovarian cancer ..... 19

|                                                                                                                                                                           |    |
|---------------------------------------------------------------------------------------------------------------------------------------------------------------------------|----|
| Figure S15: Leave-one-out inverse-variance weighted mendelian randomization analyses of depression on Serous ovarian cancer: low grade and low malignant potential .....  | 20 |
| Figure S16: Leave-one-out inverse-variance weighted mendelian randomization analyses of depression on Serous ovarian cancer: low malignant potential.....                 | 21 |
| Figure S17: Leave-one-out inverse-variance weighted mendelian randomization analyses of depression on Mucinous ovarian cancer: invasive and low malignant potential ..... | 22 |
| Figure S18: Leave-one-out inverse-variance weighted mendelian randomization analyses of depression on Lung adenocarcinoma .....                                           | 23 |
| Figure S19: Leave-one-out inverse-variance weighted mendelian randomization analyses of depression on Lung cancer .....                                                   | 24 |
| Figure S20: Leave-one-out inverse-variance weighted mendelian randomization analyses of depression on Squamous cell lung cancer .....                                     | 25 |
| Figure S21: Leave-one-out inverse-variance weighted mendelian randomization analyses of depression on Glioma .....                                                        | 26 |
| Figure S22: Leave-one-out inverse-variance weighted mendelian randomization analyses of depression on Pancreatic cancer .....                                             | 27 |
| Figure S23: Leave-one-out inverse-variance weighted mendelian randomization analyses of depression on Colon adenocarcinoma .....                                          | 28 |
| Figure S24: Leave-one-out inverse-variance weighted mendelian randomization analyses of depression on Colorectal cancer .....                                             | 29 |
| Figure S25: Leave-one-out inverse-variance weighted mendelian randomization analyses of depression on Follicular lymphoma .....                                           | 30 |
| Figure S26: Leave-one-out inverse-variance weighted mendelian randomization analyses of depression on Non-follicular lymphoma .....                                       | 31 |
| Figure S27: Leave-one-out inverse-variance weighted mendelian randomization analyses of depression on Other and unspecified types of non-Hodgkin lymphoma.....            | 32 |
| Figure S28: Leave-one-out inverse-variance weighted mendelian randomization analyses of depression on Malignant neoplasm of bladder .....                                 | 33 |

Figure S29: Leave-one-out inverse-variance weighted mendelian randomization analyses of depression on Malignant neoplasm of thyroid gland..... 34

Figure S30: Leave-one-out inverse-variance weighted mendelian randomization analyses of depression on Malignant neoplasm of kidney, except renal pelvis ..... 35

Figure S31: Leave-one-out inverse-variance weighted mendelian randomization analyses of Breast cancer on depression ..... 36

Figure S32: Leave-one-out inverse-variance weighted mendelian randomization analyses of ER+ Breast cancer on depression ..... 37

Figure S33: Leave-one-out inverse-variance weighted mendelian randomization analyses of ER- Breast cancer on depression ..... 38

Figure S34: Leave-one-out inverse-variance weighted mendelian randomization analyses of different types of ovarian cancer on depression ..... 39

Figure S35: Leave-one-out inverse-variance weighted mendelian randomization analyses of different types of cancer on depression ..... 40

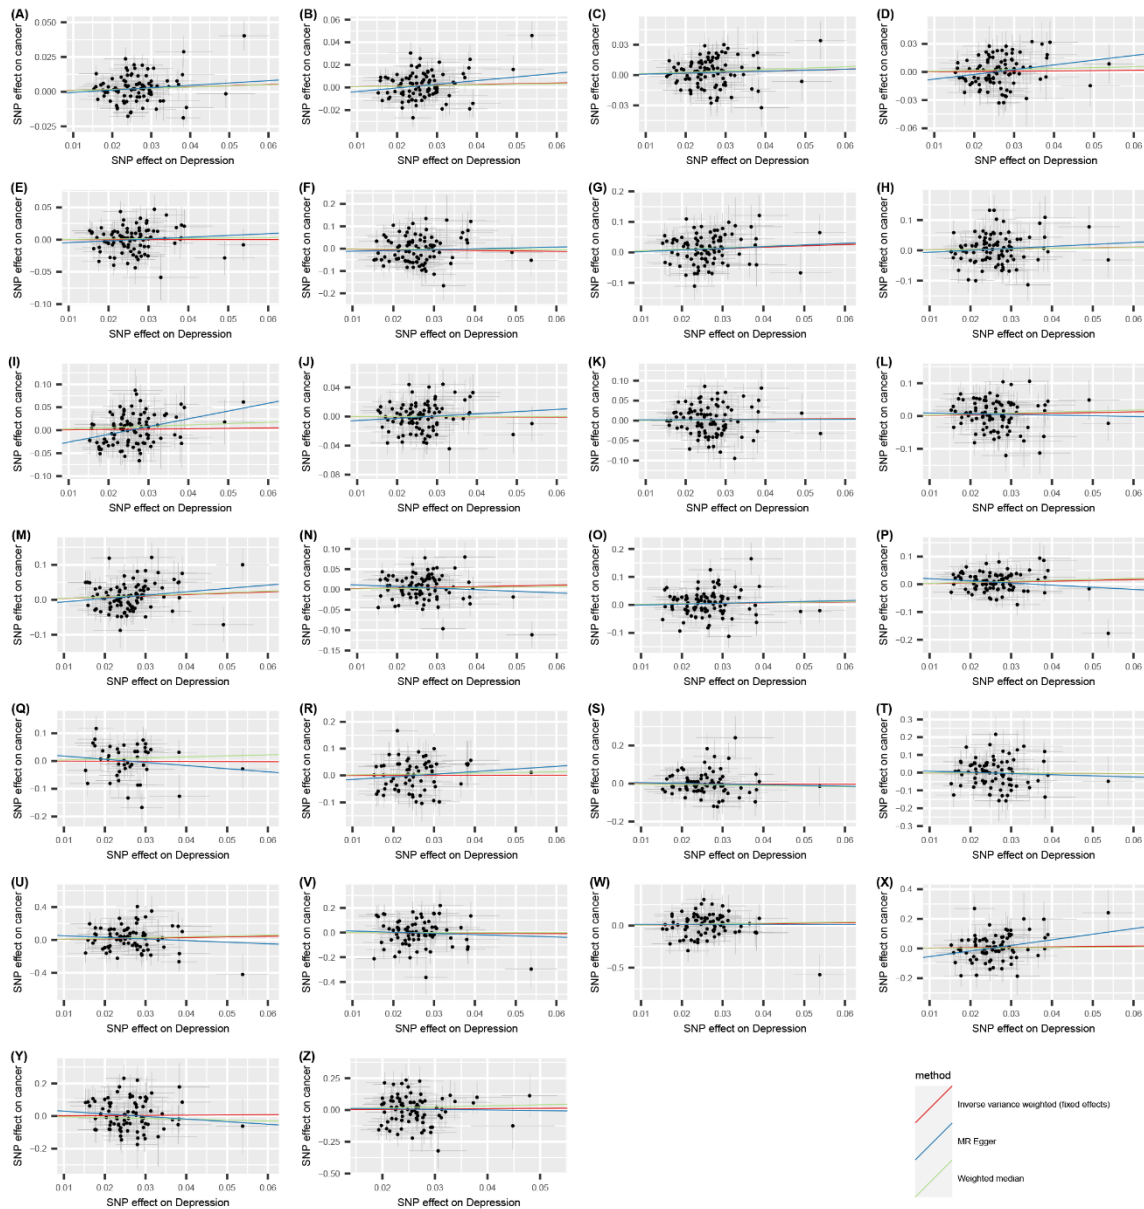

**Figure S1: Scatter plot of the causal effect of depression on different types of cancer, with the slope of each line corresponding to estimated causal effect per method: (A) Breast cancer; (B) ER+ Breast cancer; (C) ER- Breast cancer; (D) Ovarian cancer; (E) High grade serous ovarian cancer; (F) Low grade serous ovarian cancer; (G) Invasive mucinous ovarian cancer; (H) Clear cell ovarian cancer; (I) Endometrioid ovarian cancer; (J) High grade and low grade serous ovarian cancer; (K) Serous ovarian cancer: low grade and low malignant potential; (L) Serous ovarian cancer: low malignant potential; (M) Mucinous ovarian cancer: invasive and low malignant potential; (N) Lung cancer; (O) Lung adenocarcinoma; (P) Squamous cell lung cancer; (Q) Glioma; (R) Pancreatic**

cancer; (S) Colorectal cancer; (T) Colon adenocarcinoma; (U) Follicular lymphoma; (V) Non-follicular lymphoma; (W) Other and unspecified types of non-Hodgkin lymphoma; (X) Malignant neoplasm of bladder; (Y) Malignant neoplasm of thyroid gland; (Z) Malignant neoplasm of kidney, except renal pelvis.

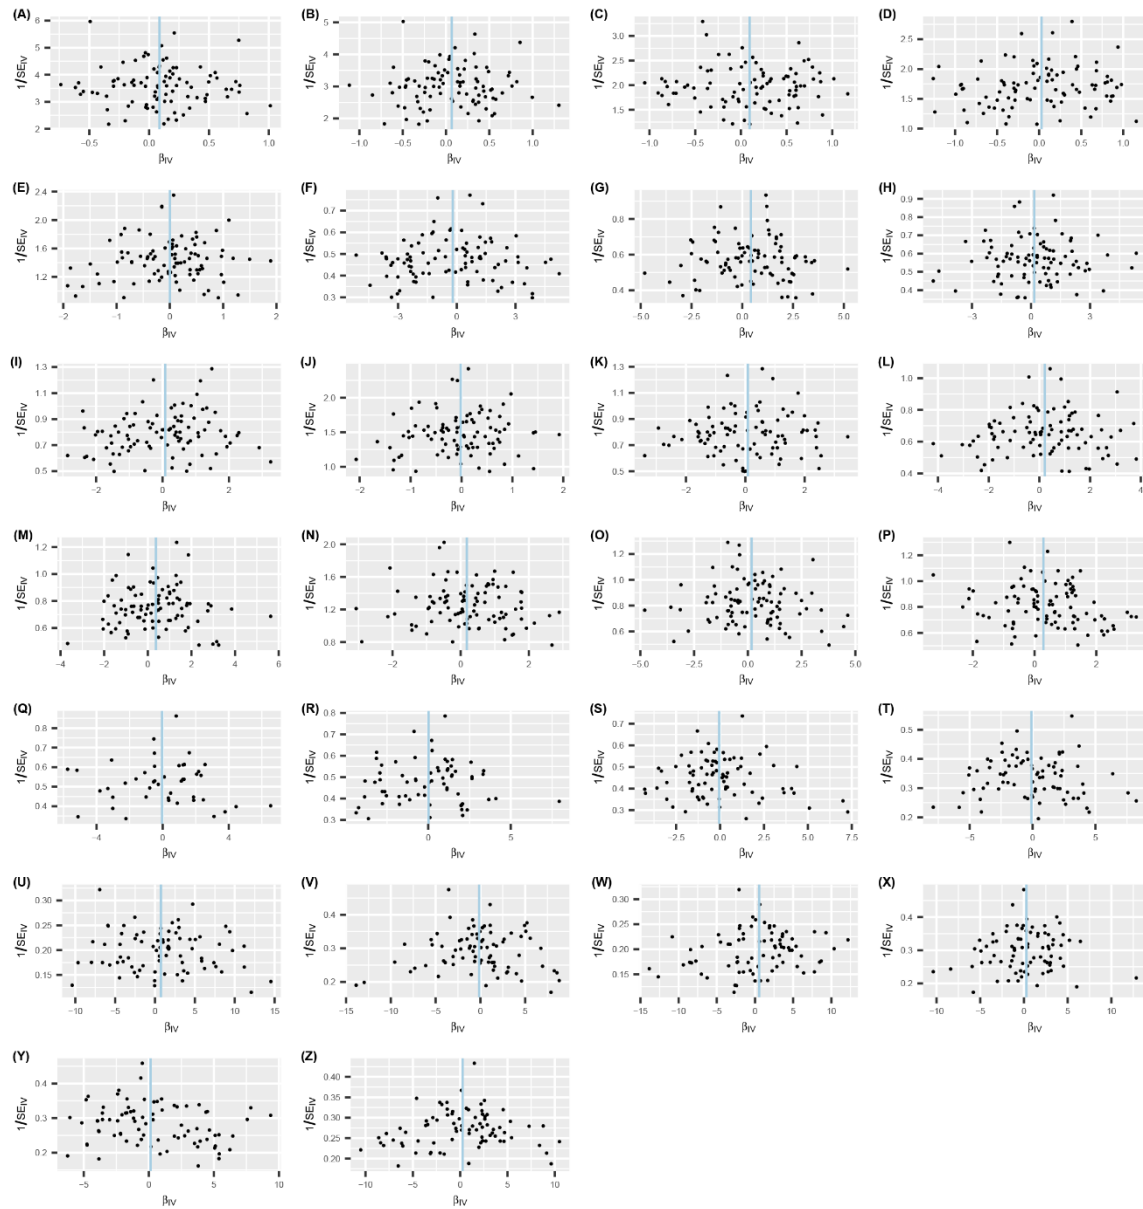

**Figure S2: Funnel plot of the causal effect of depression on different types of cancer:**

(A) Breast cancer; (B) ER+ Breast cancer; (C) ER- Breast cancer; (D) Ovarian cancer; (E) High grade serous ovarian cancer; (F) Low grade serous ovarian cancer; (G) Invasive mucinous ovarian cancer; (H) Clear cell ovarian cancer; (I) Endometrioid ovarian cancer; (J) High grade and low grade serous ovarian cancer; (K) Serous ovarian cancer: low grade and low malignant potential; (L) Serous ovarian cancer: low malignant potential; (M) Mucinous ovarian cancer: invasive and low malignant potential; (N) Lung cancer; (O) Lung adenocarcinoma; (P) Squamous cell lung cancer; (Q) Glioma; (R) Pancreatic cancer; (S) Colorectal cancer; (T) Colon adenocarcinoma; (U) Follicular lymphoma; (V)

Non-follicular lymphoma; (W) Other and unspecified types of non-Hodgkin lymphoma;  
(X) Malignant neoplasm of bladder; (Y) Malignant neoplasm of thyroid gland; (Z)  
Malignant neoplasm of kidney, except renal pelvis.

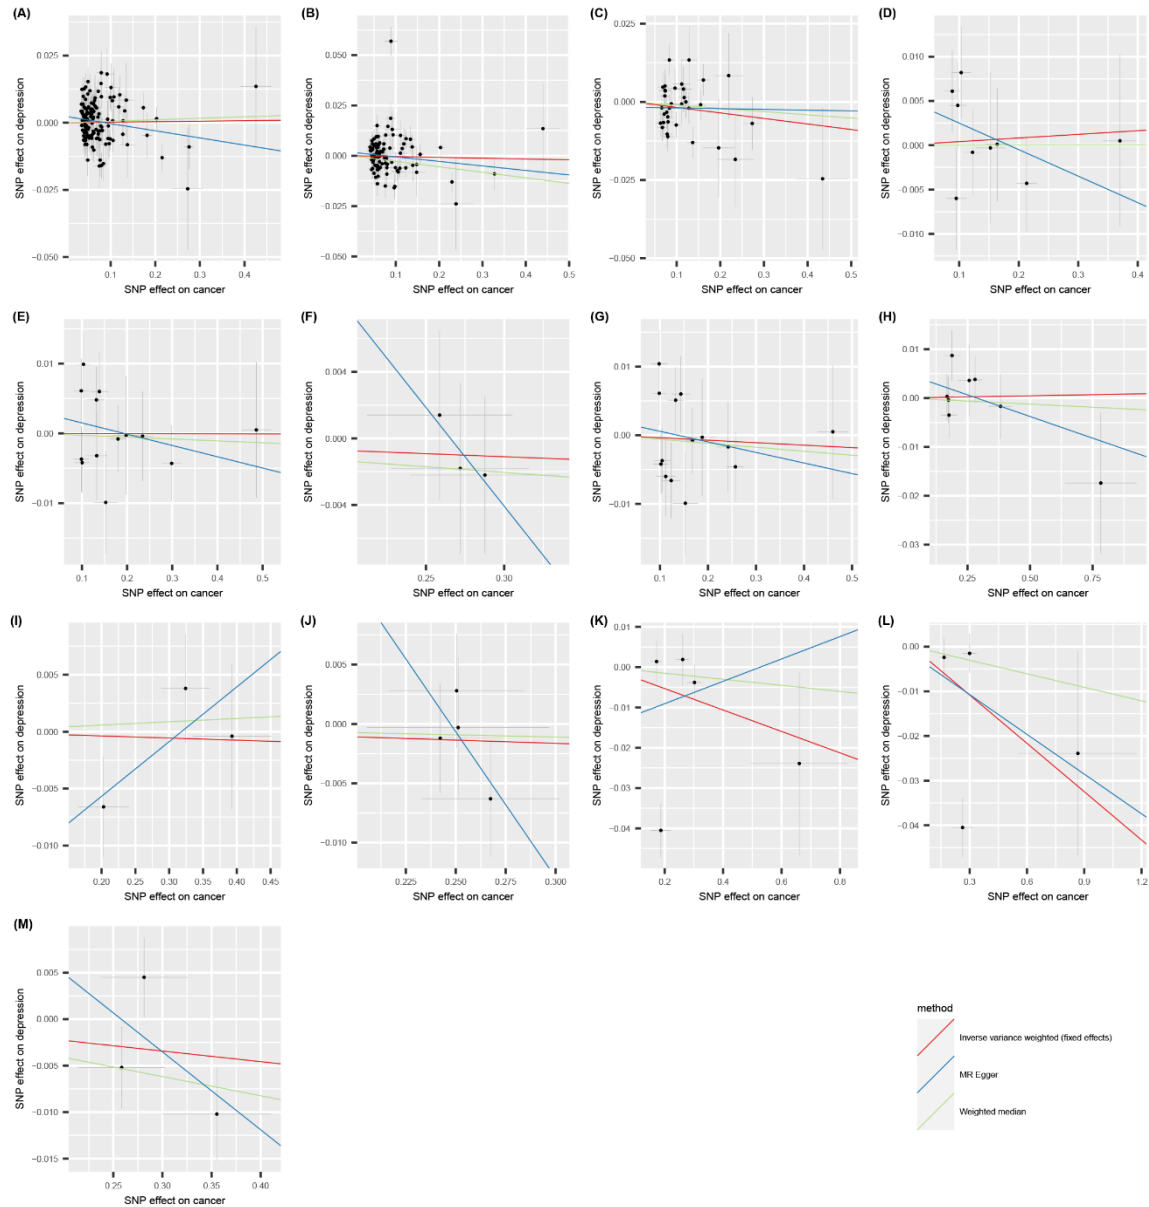

**Figure S3: Scatter plot of the causal effect of different types of cancer on depression, with the slope of each line corresponding to estimated causal effect per method: (A) Breast cancer; (B) ER+ Breast cancer; (C) ER- Breast cancer; (D) Ovarian cancer; (E) High grade serous ovarian cancer; (F) Invasive mucinous ovarian cancer; (G) High grade and low grade serous ovarian cancer; (H) Serous ovarian cancer: low grade and low malignant potential; (I) Serous ovarian cancer: low malignant potential; (J) Mucinous ovarian cancer: invasive and low malignant potential; (K) Lung cancer; (L) Squamous cell lung cancer; (M) Glioma.**



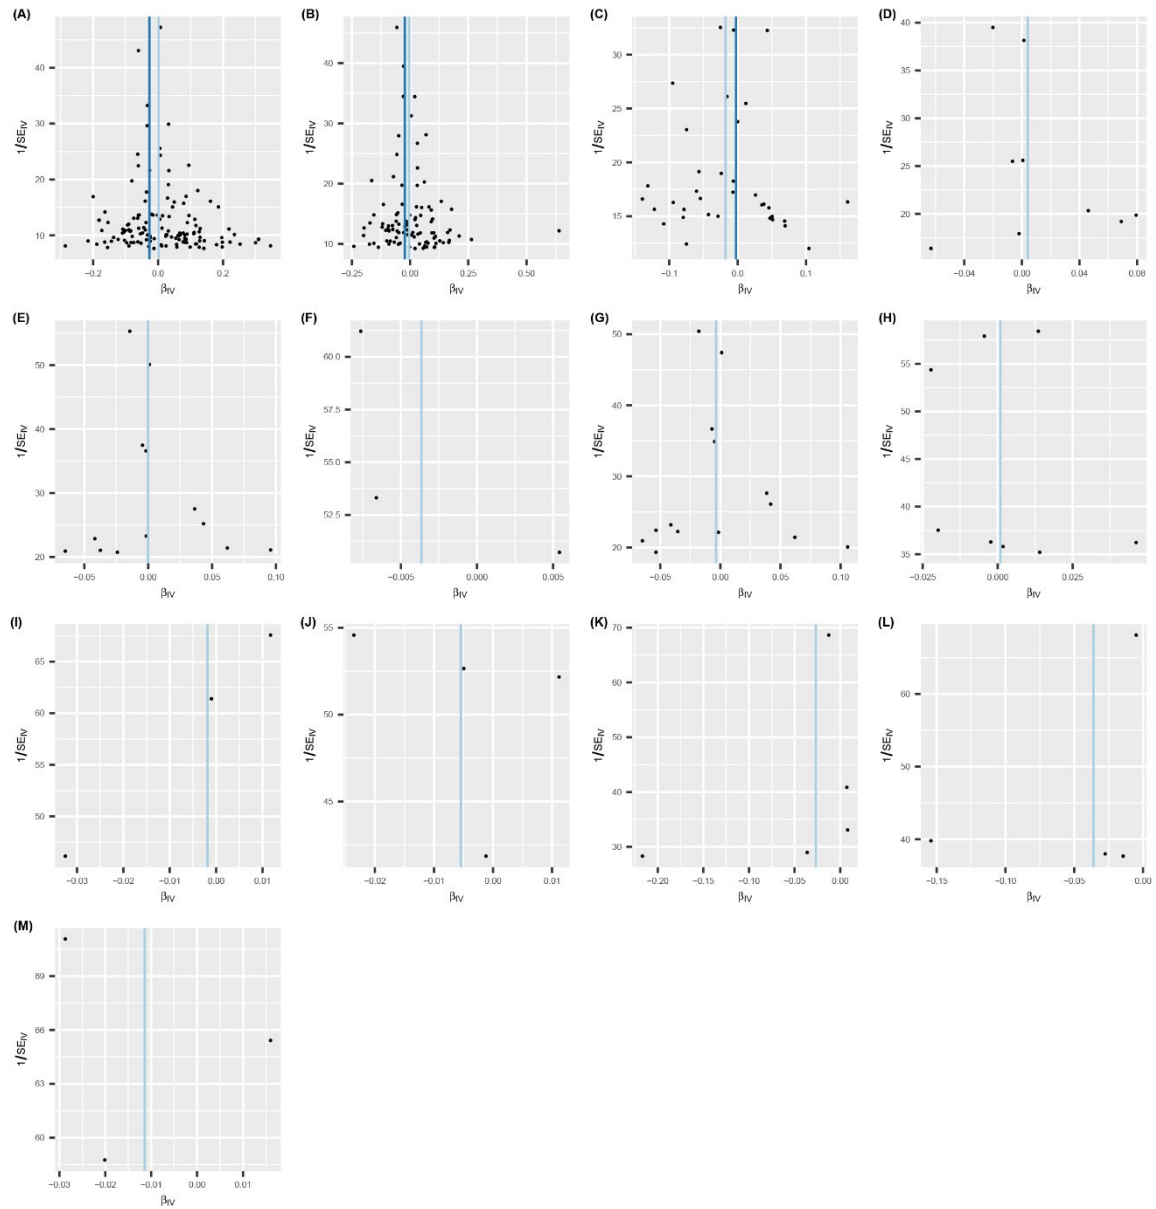

**Figure S4: Funnel plot of the causal effect of different types of cancer on depression:**

(A) Breast cancer; (B) ER+ Breast cancer; (C) ER- Breast cancer; (D) Ovarian cancer; (E) High grade serous ovarian cancer; (F) Invasive mucinous ovarian cancer; (G) High grade and low grade serous ovarian cancer; (H) Serous ovarian cancer: low grade and low malignant potential; (I) Serous ovarian cancer: low malignant potential; (J) Mucinous ovarian cancer: invasive and low malignant potential; (K) Lung cancer; (L) Squamous cell lung cancer; (M) Glioma.

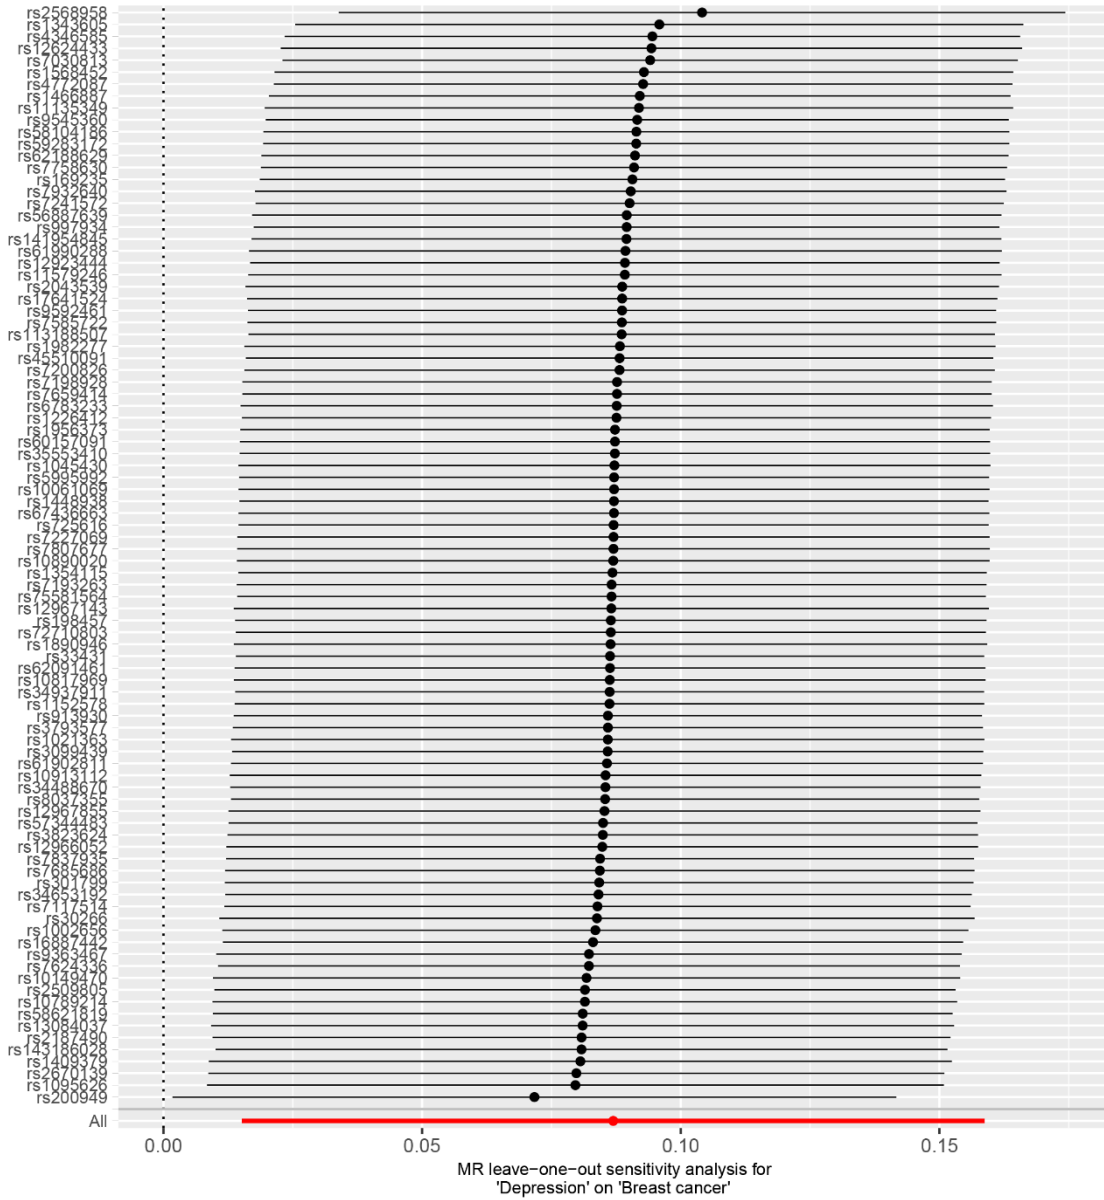

**Figure S5: Leave-one-out inverse-variance weighted mendelian randomization analyses of depression on Breast cancer**

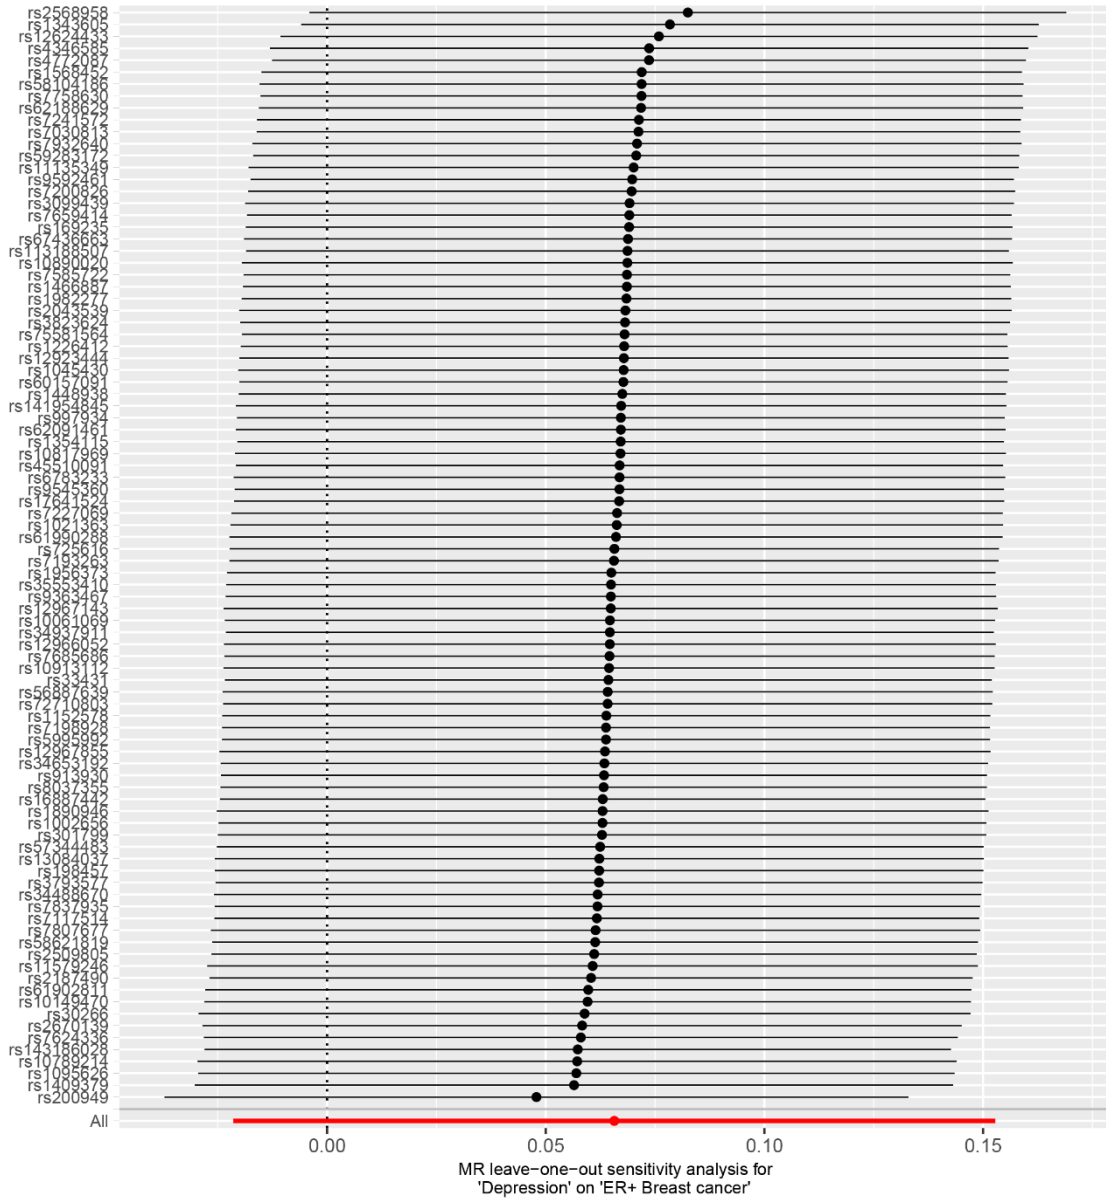

**Figure S6: Leave-one-out inverse-variance weighted mendelian randomization analyses of depression on ER+ Breast cancer**

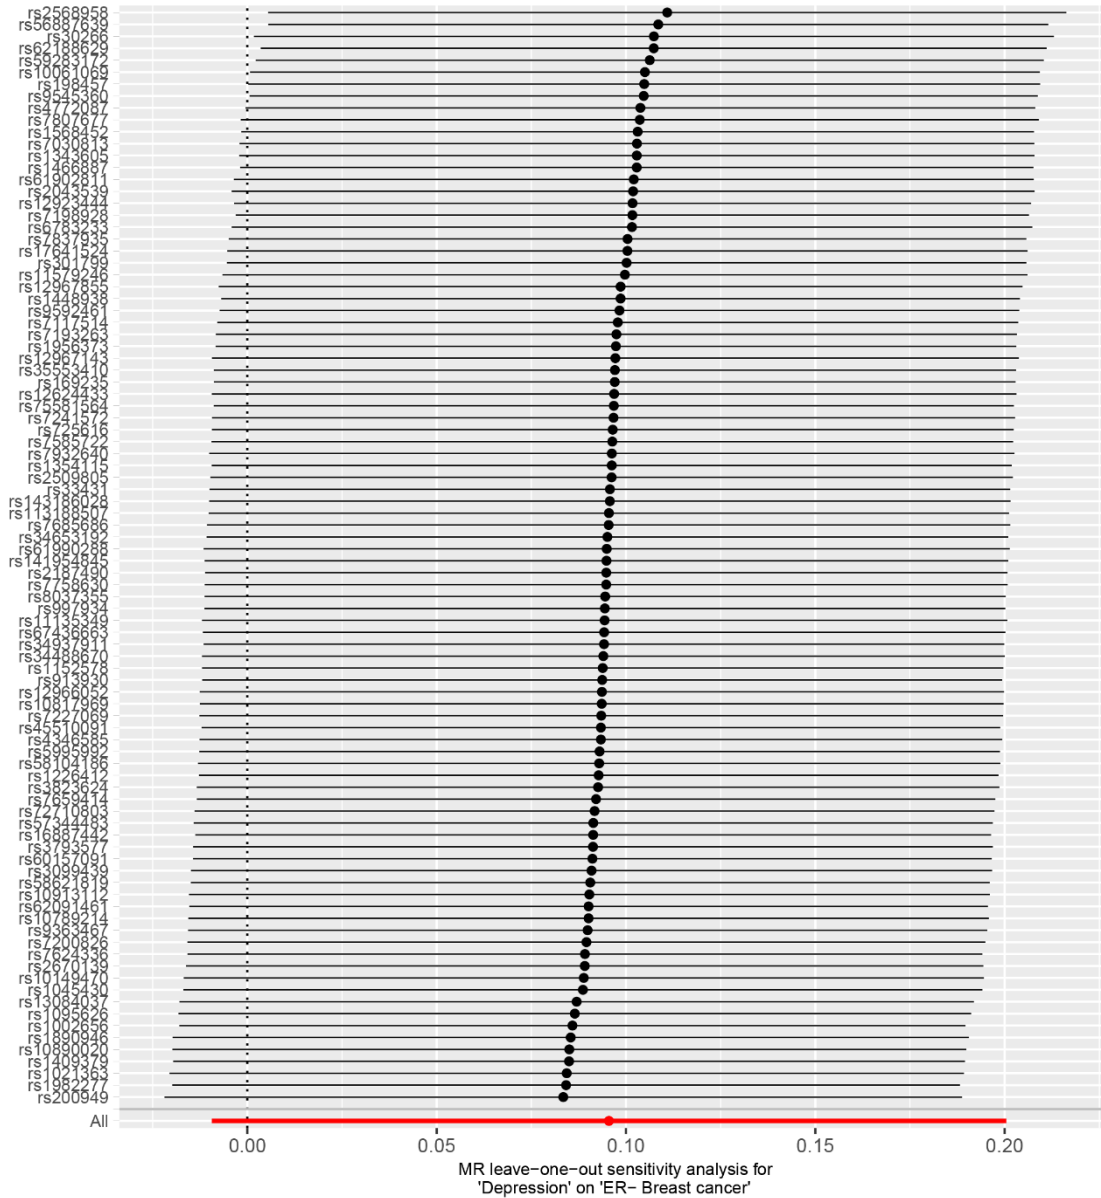

**Figure S7: Leave-one-out inverse-variance weighted mendelian randomization analyses of depression on ER- Breast cancer**

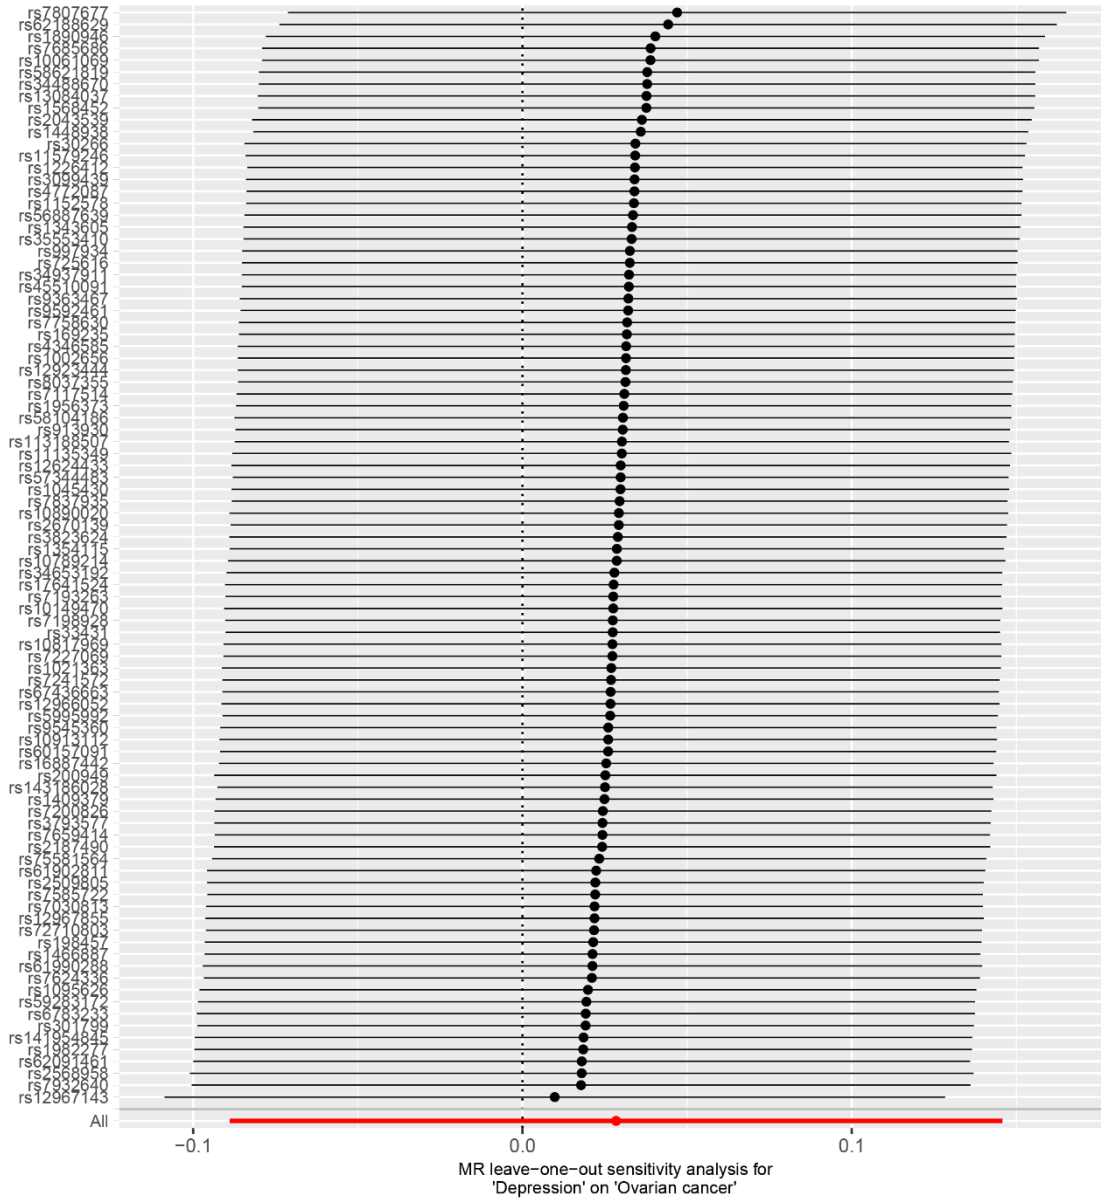

**Figure S8: Leave-one-out inverse-variance weighted mendelian randomization analyses of depression on Ovarian cancer**

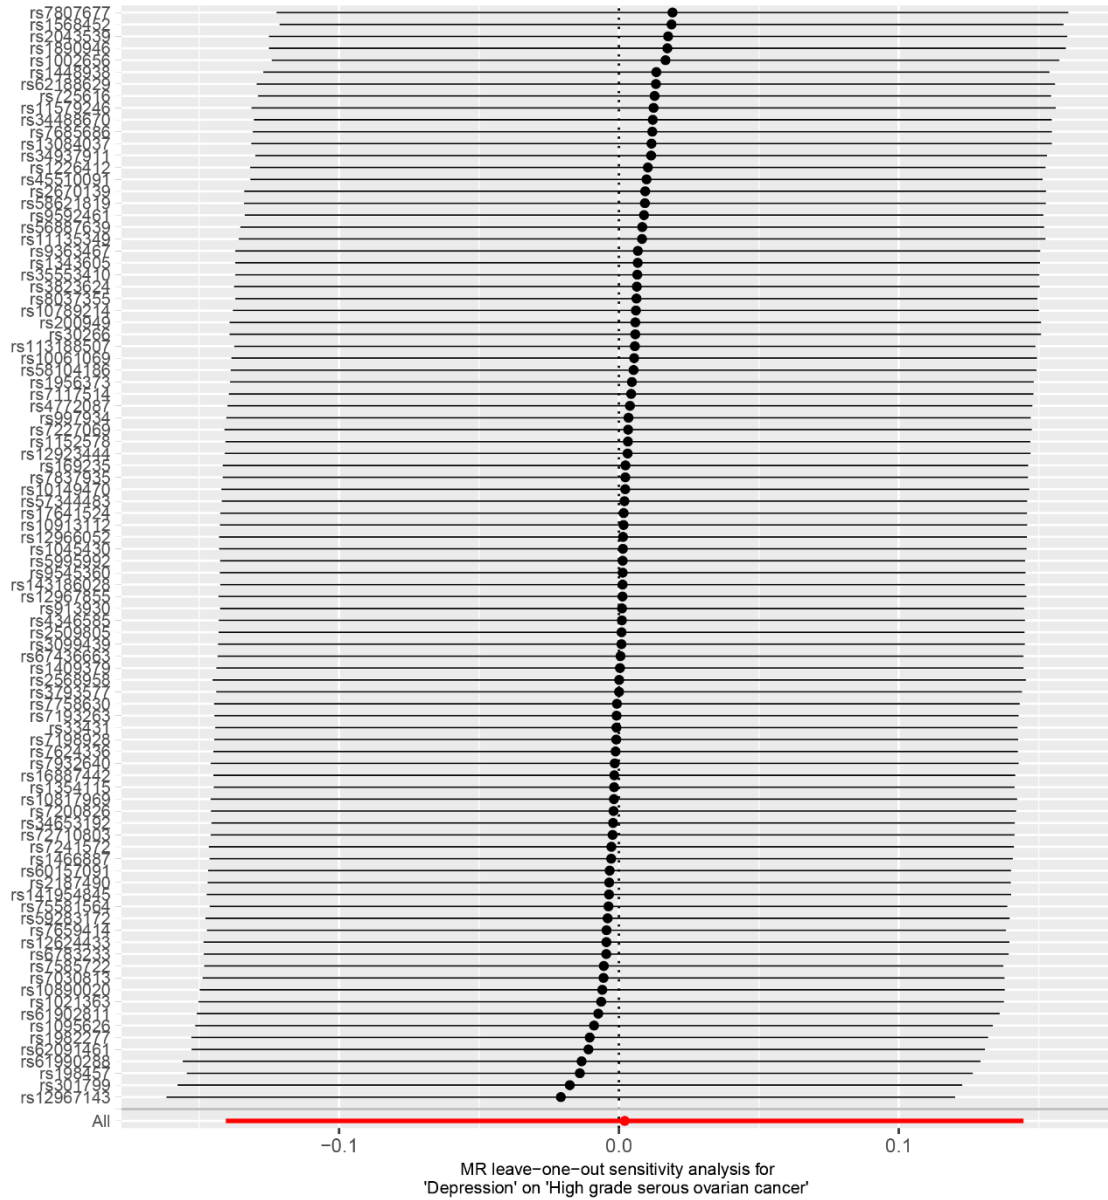

**Figure S9: Leave-one-out inverse-variance weighted mendelian randomization analyses of depression on High grade serous ovarian cancer**

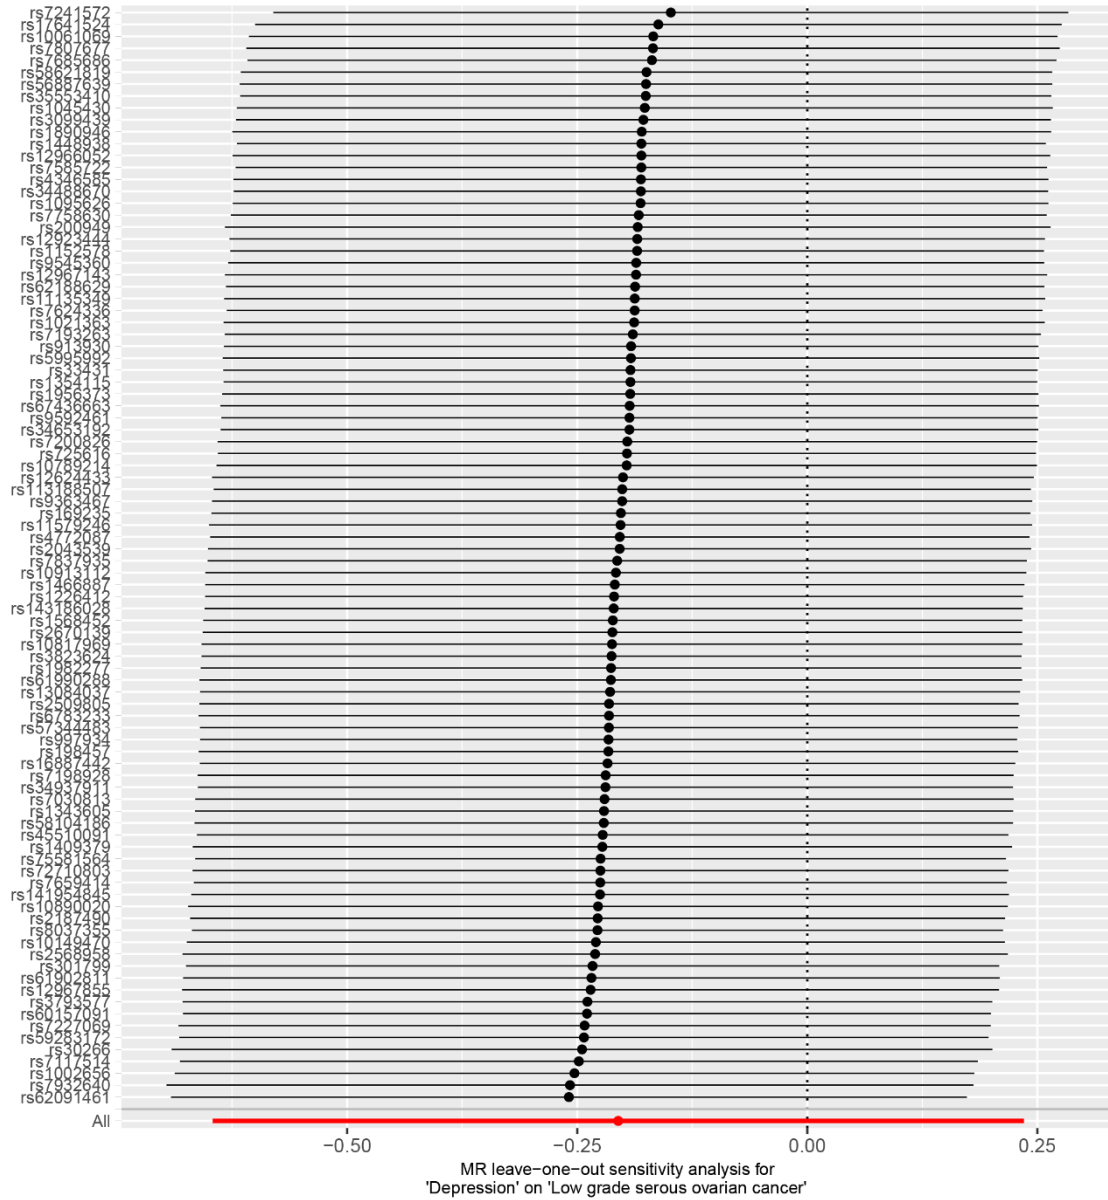

**Figure S10: Leave-one-out inverse-variance weighted mendelian randomization analyses of depression on Low grade serous ovarian cancer**

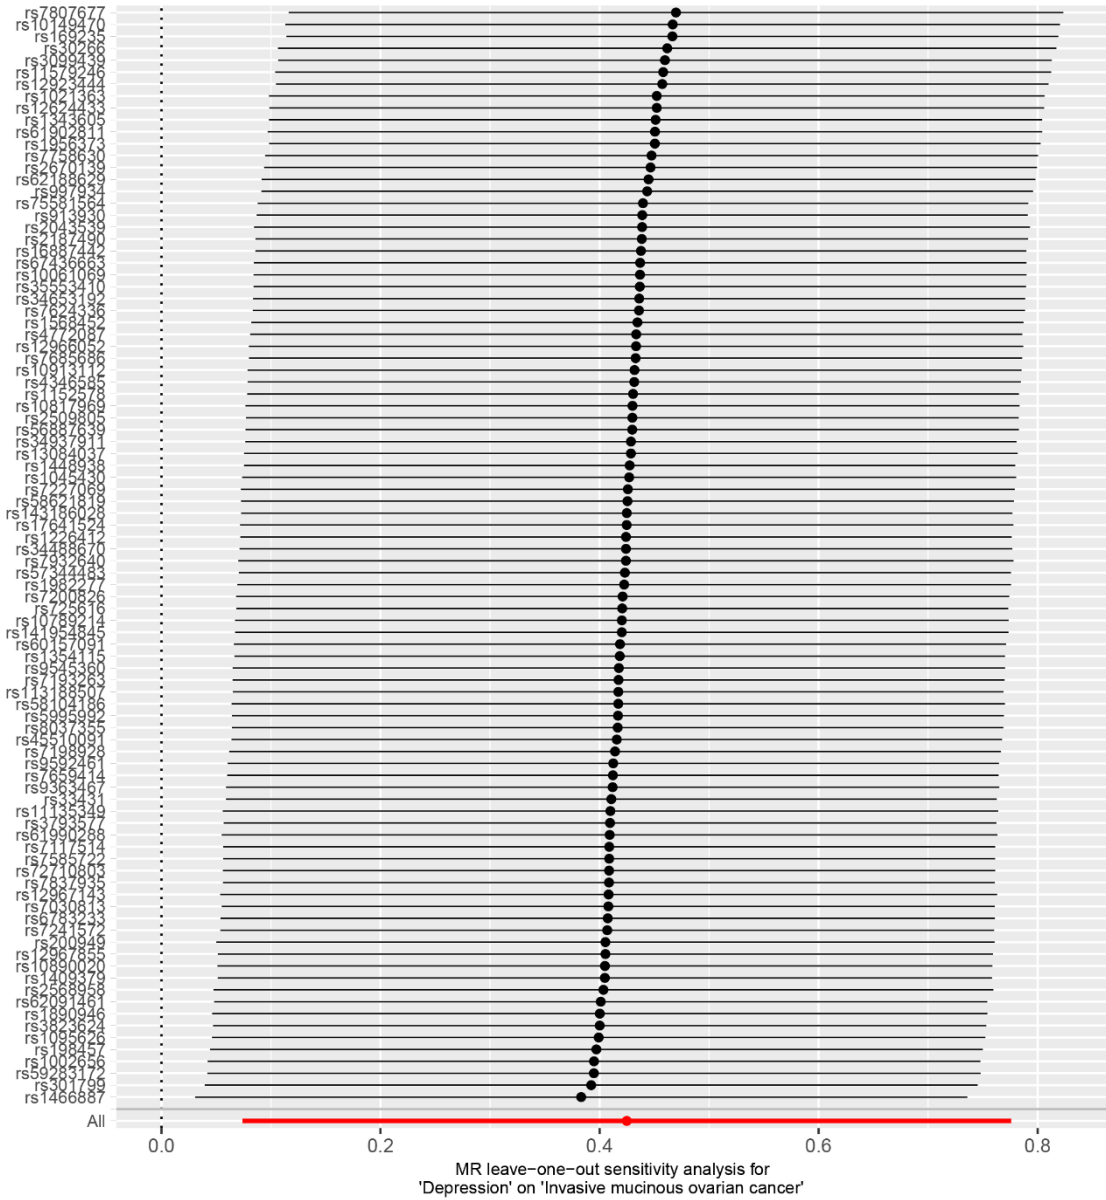

**Figure S11: Leave-one-out inverse-variance weighted mendelian randomization analyses of depression on Invasive mucinous ovarian cancer**



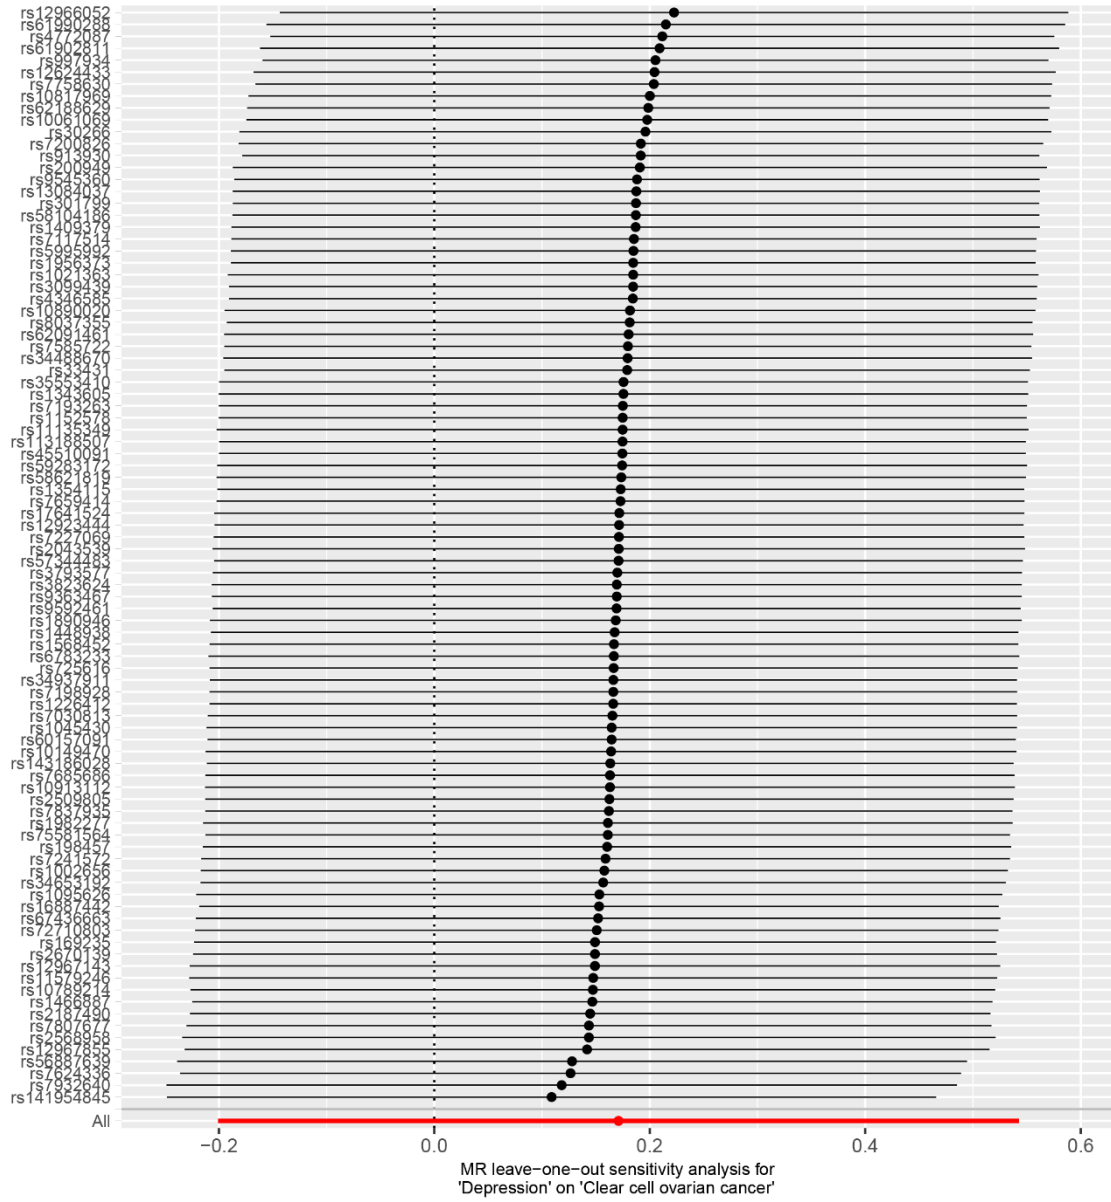

**Figure S12: Leave-one-out inverse-variance weighted mendelian randomization analyses of depression on Clear cell ovarian cancer**

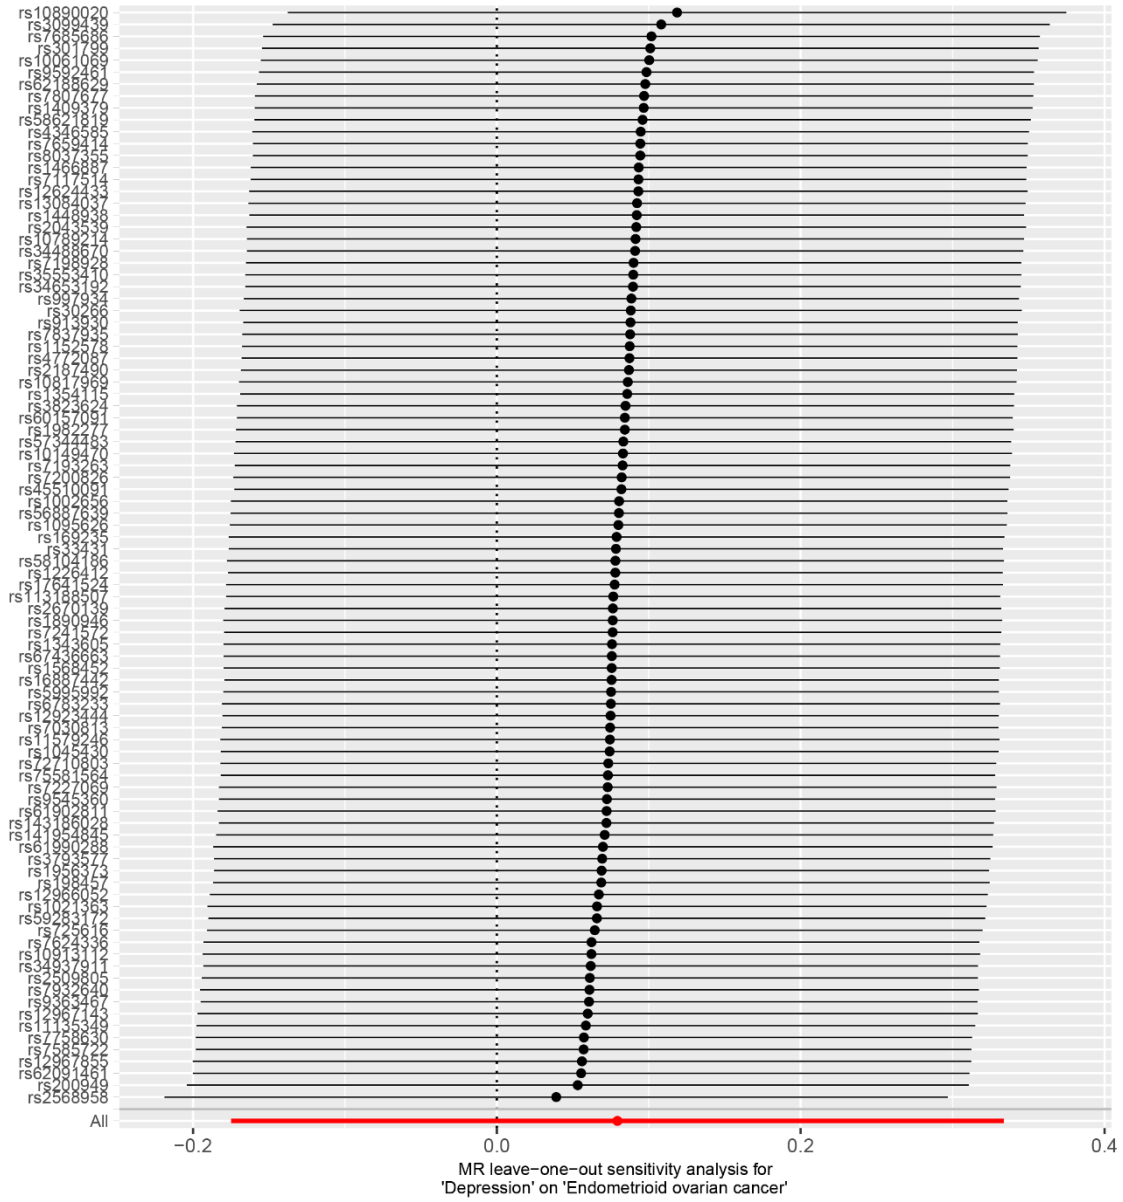

**Figure S13: Leave-one-out inverse-variance weighted mendelian randomization analyses of depression on Endometrioid ovarian cancer**

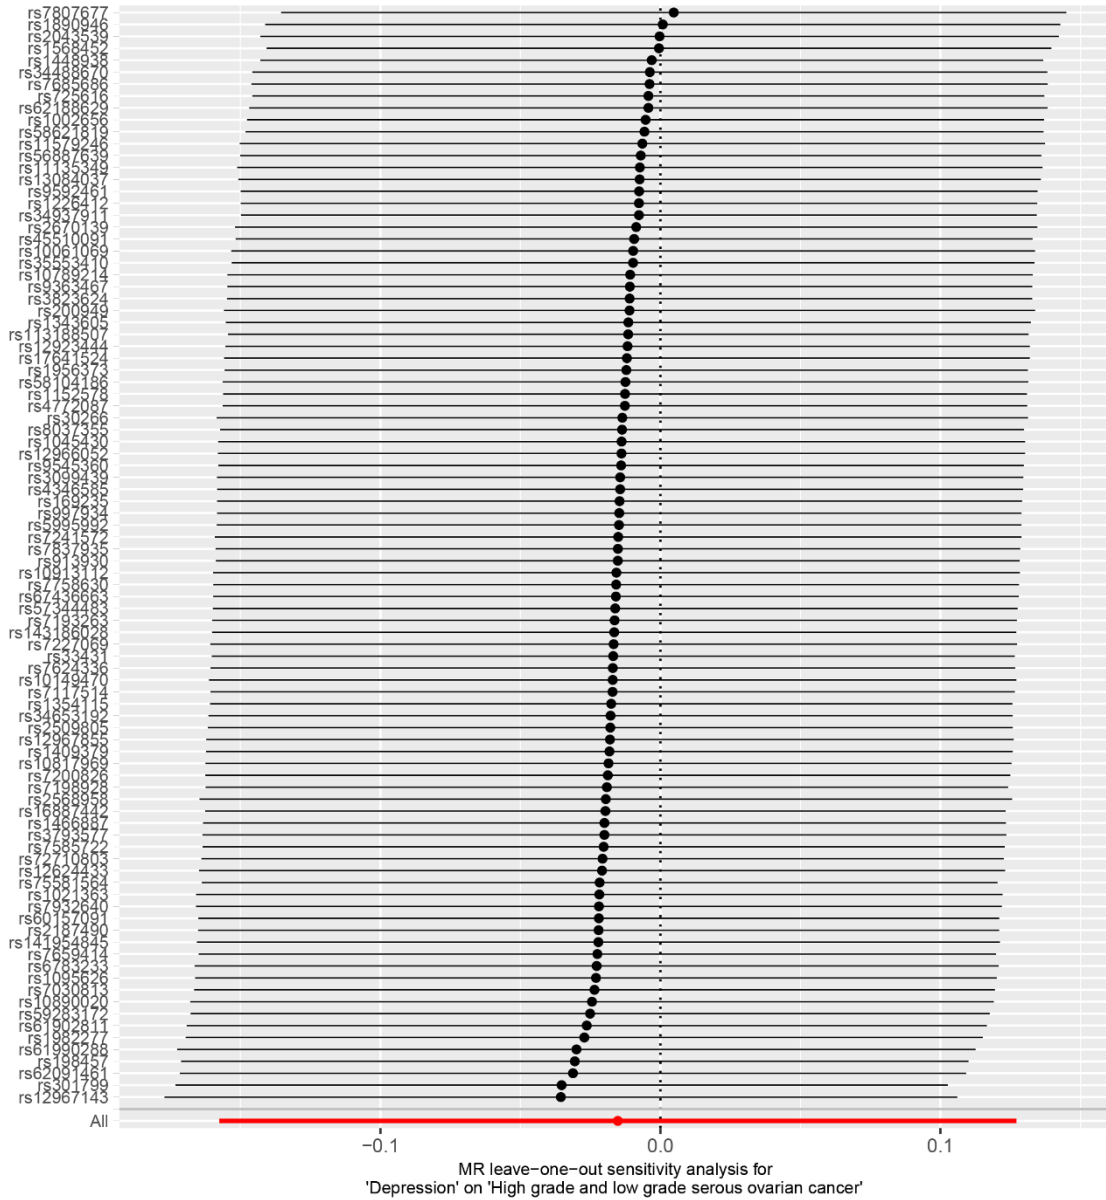

**Figure S14: Leave-one-out inverse-variance weighted mendelian randomization analyses of depression on High grade and low grade serous ovarian cancer**

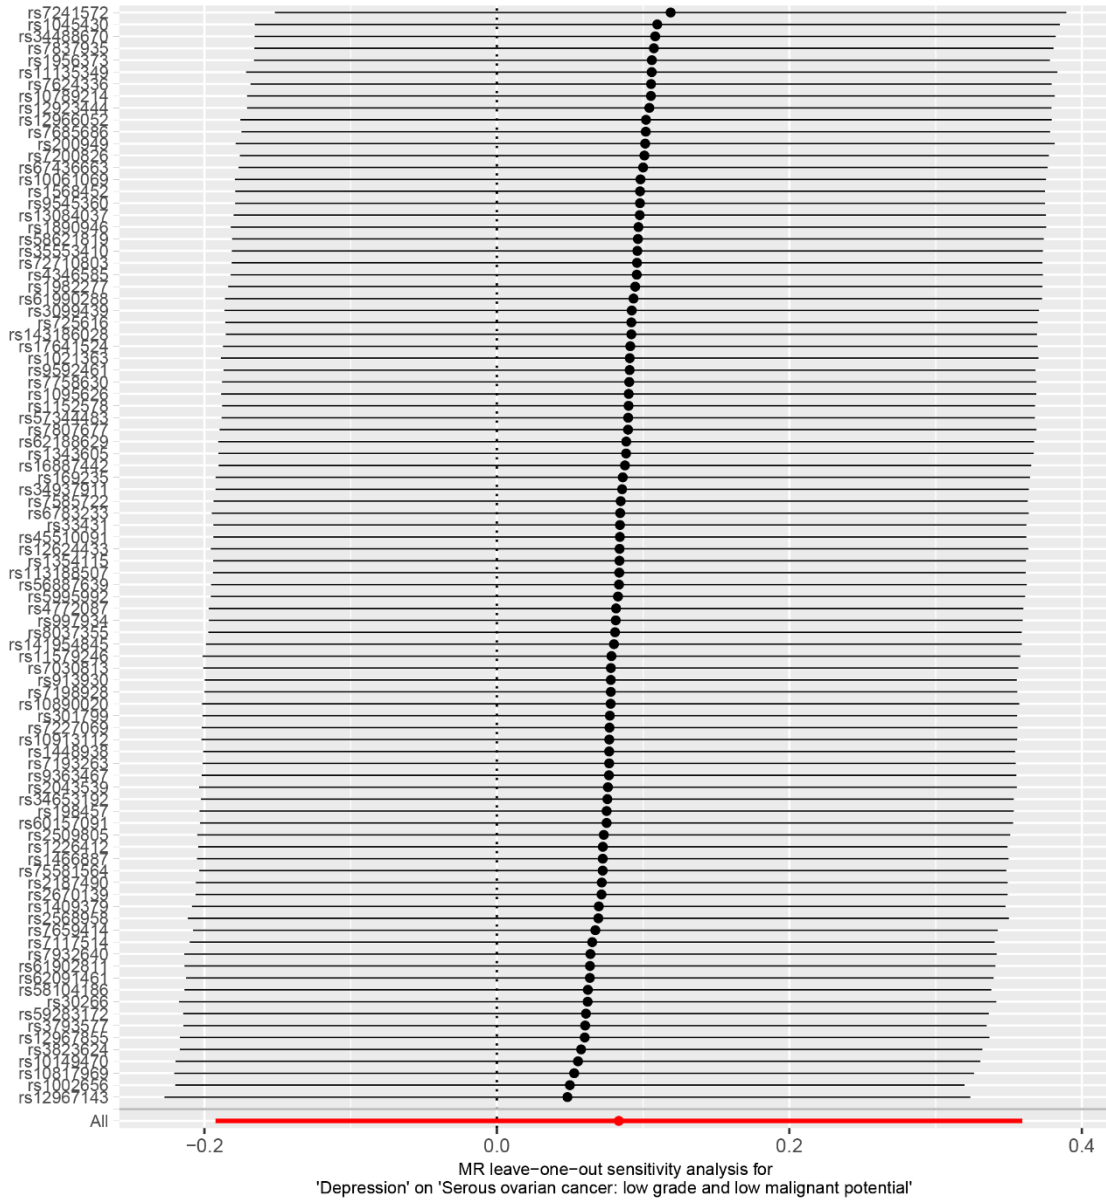

**Figure S15: Leave-one-out inverse-variance weighted mendelian randomization analyses of depression on Serous ovarian cancer: low grade and low malignant potential**

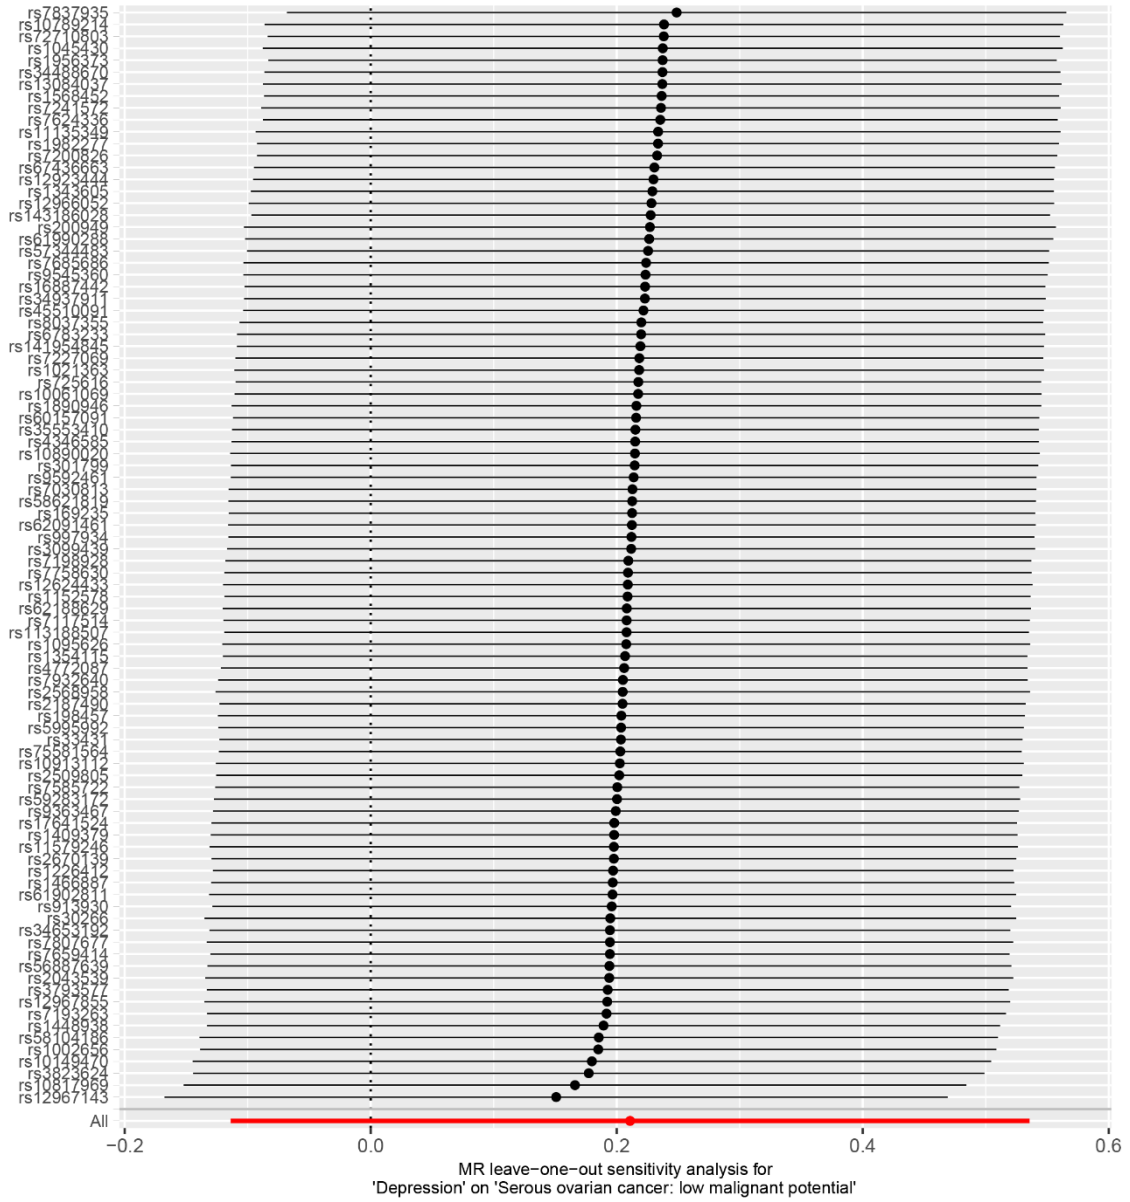

**Figure S16: Leave-one-out inverse-variance weighted mendelian randomization analyses of depression on Serous ovarian cancer: low malignant potential**

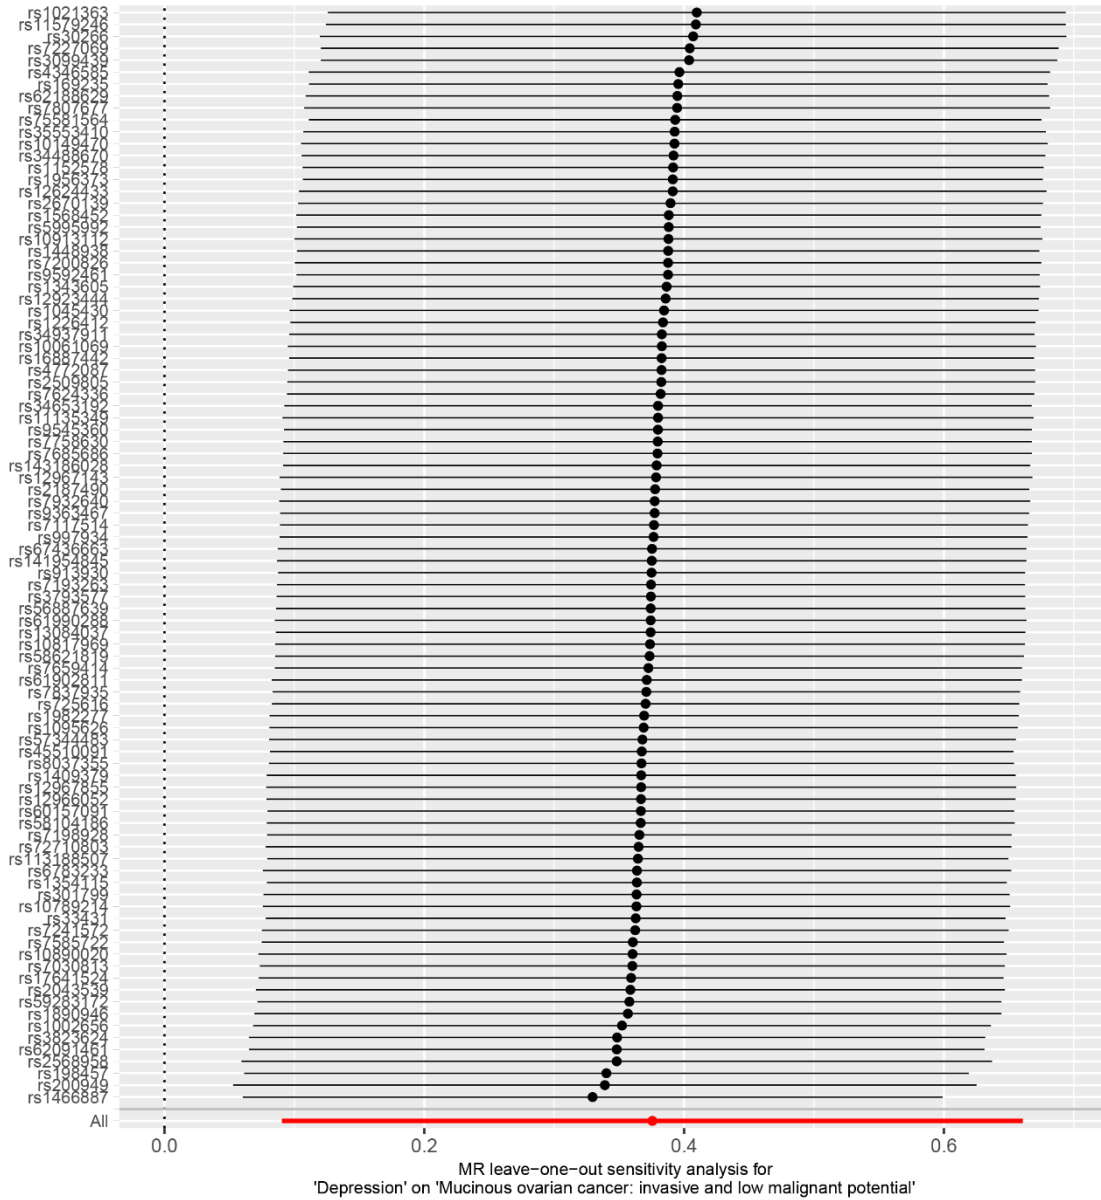

**Figure S17: Leave-one-out inverse-variance weighted mendelian randomization analyses of depression on Mucinous ovarian cancer: invasive and low malignant potential**

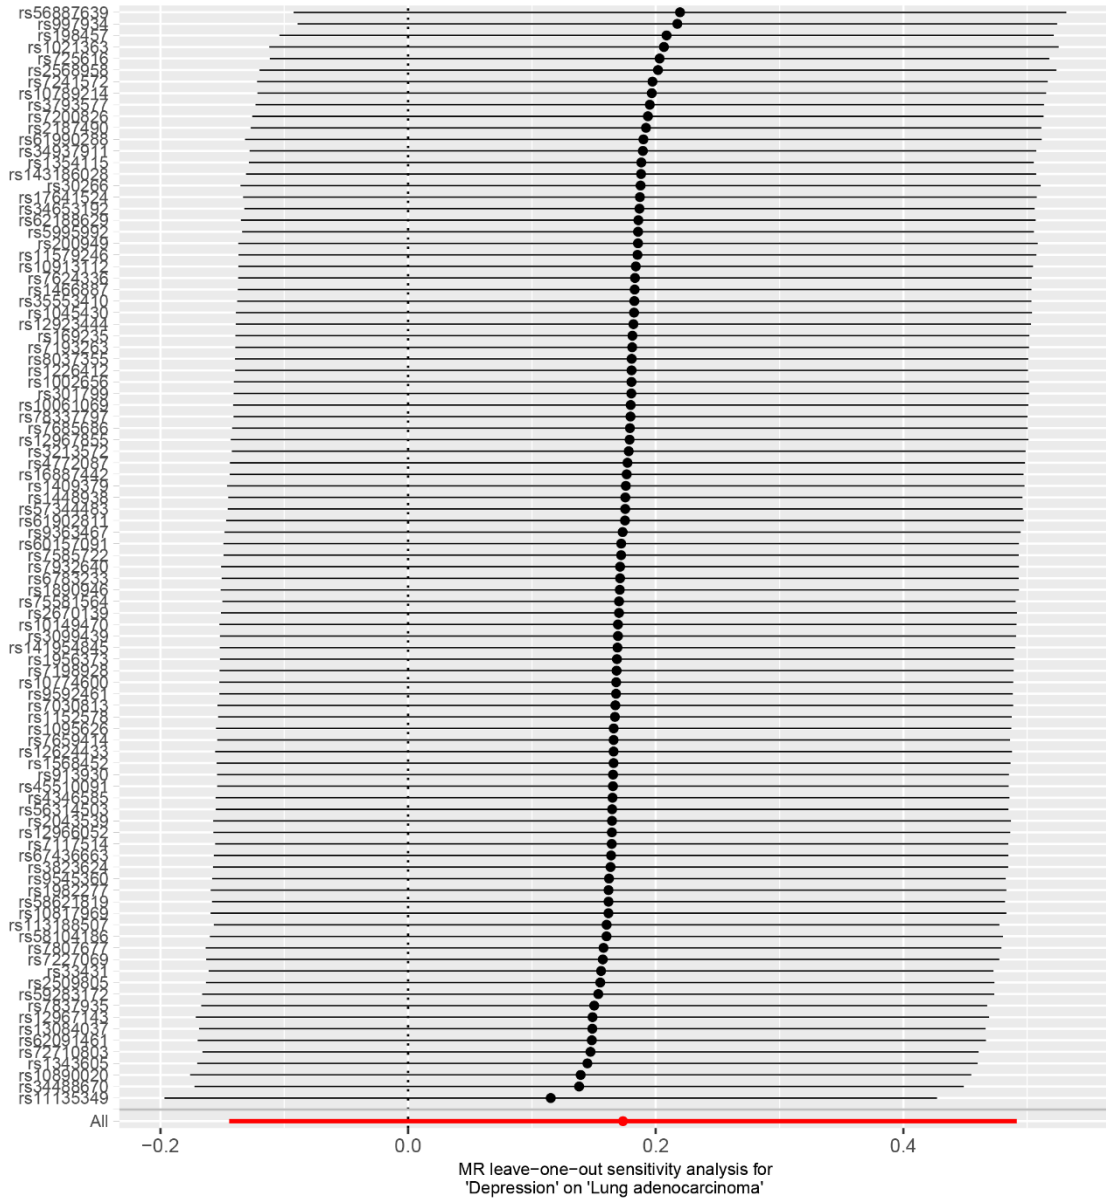

**Figure S18: Leave-one-out inverse-variance weighted mendelian randomization analyses of depression on Lung adenocarcinoma**

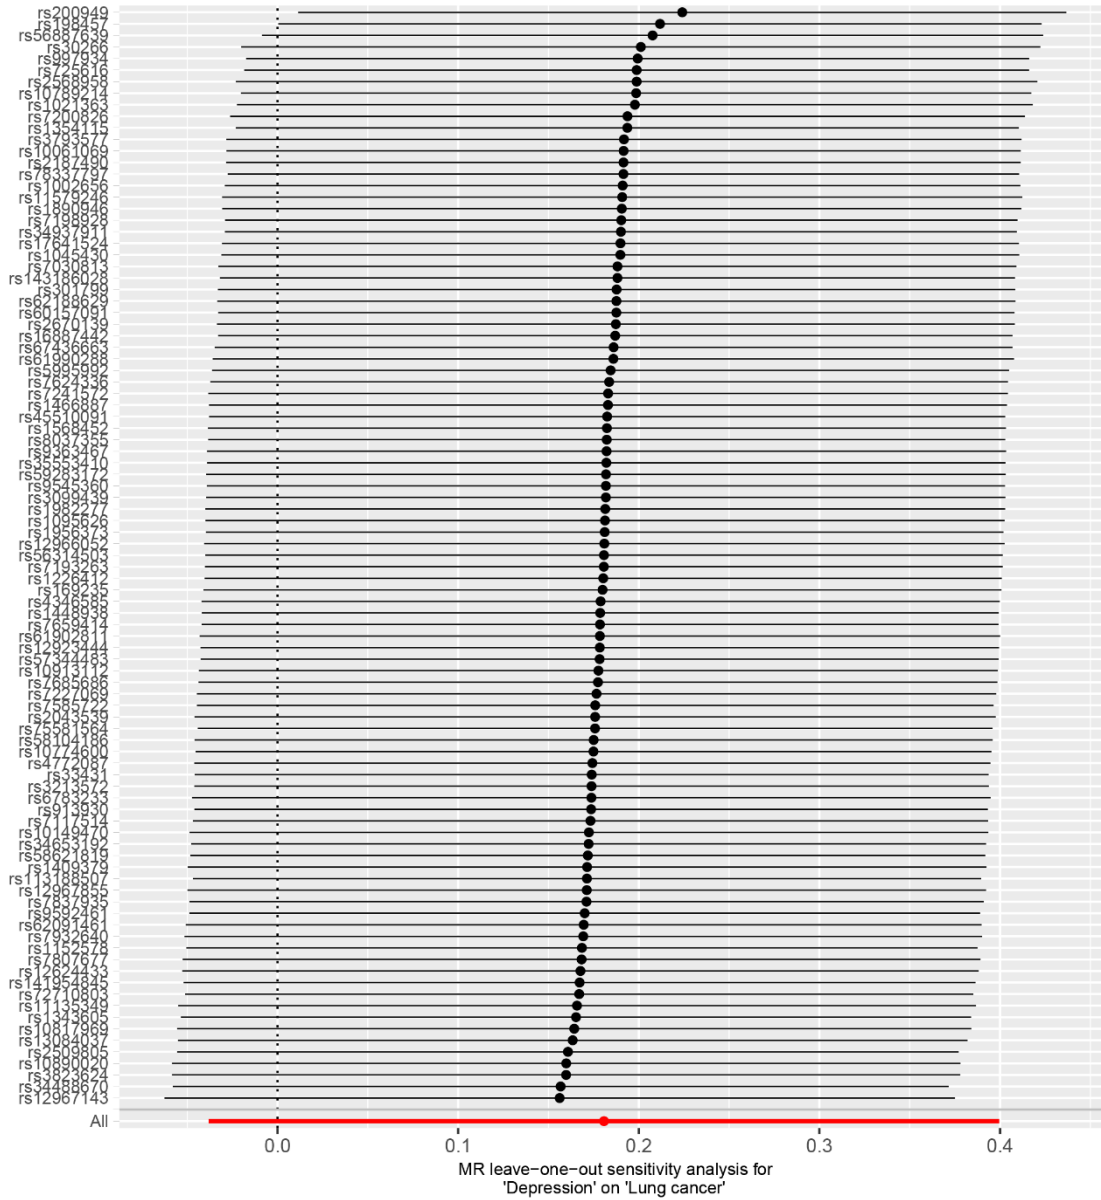

**Figure S19: Leave-one-out inverse-variance weighted mendelian randomization analyses of depression on Lung cancer**



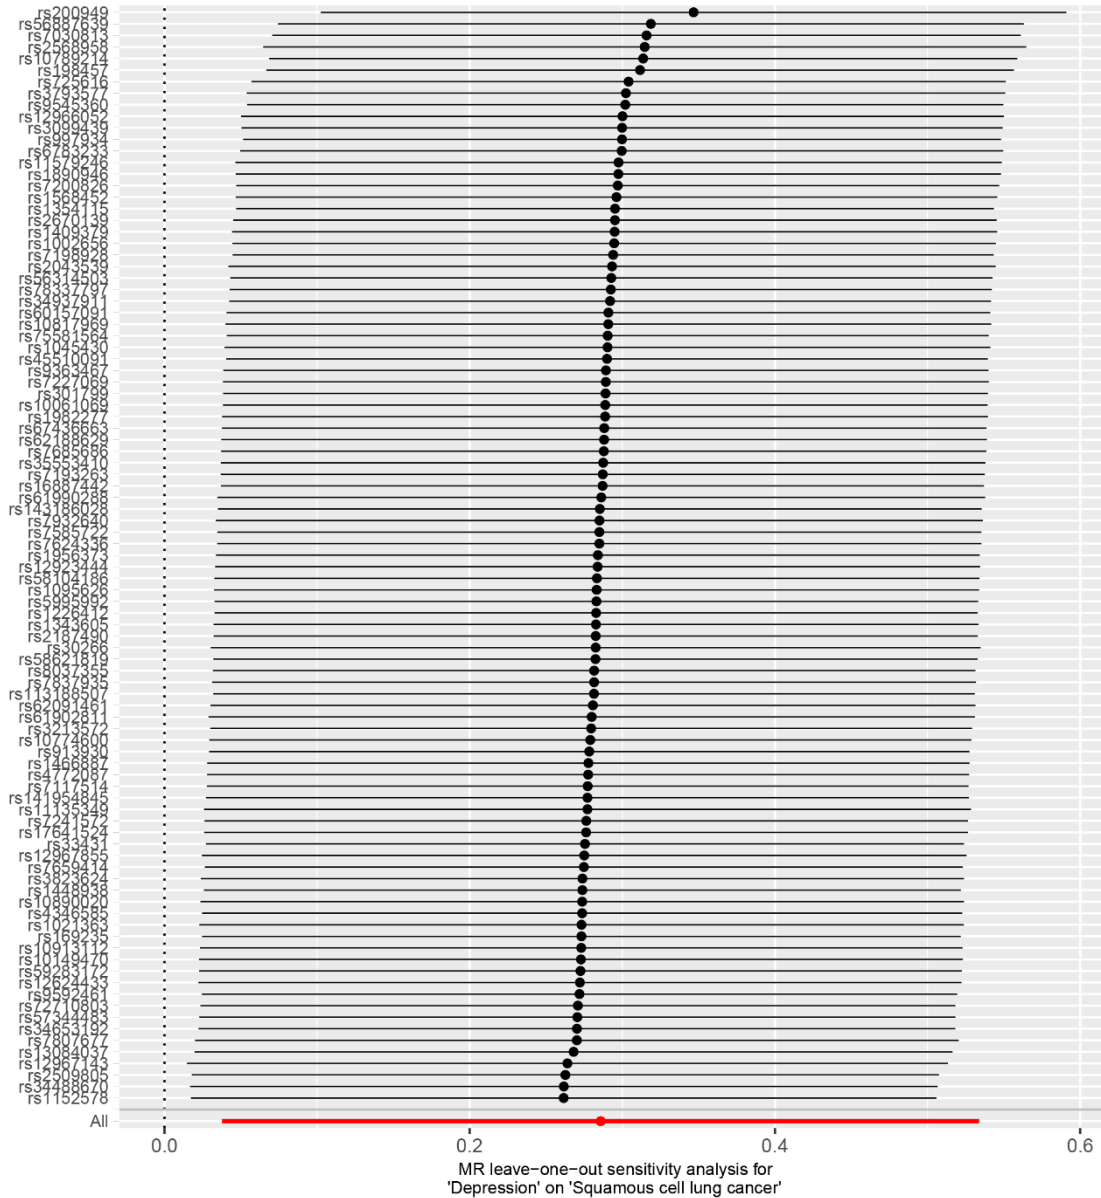

**Figure S20: Leave-one-out inverse-variance weighted mendelian randomization analyses of depression on Squamous cell lung cancer**

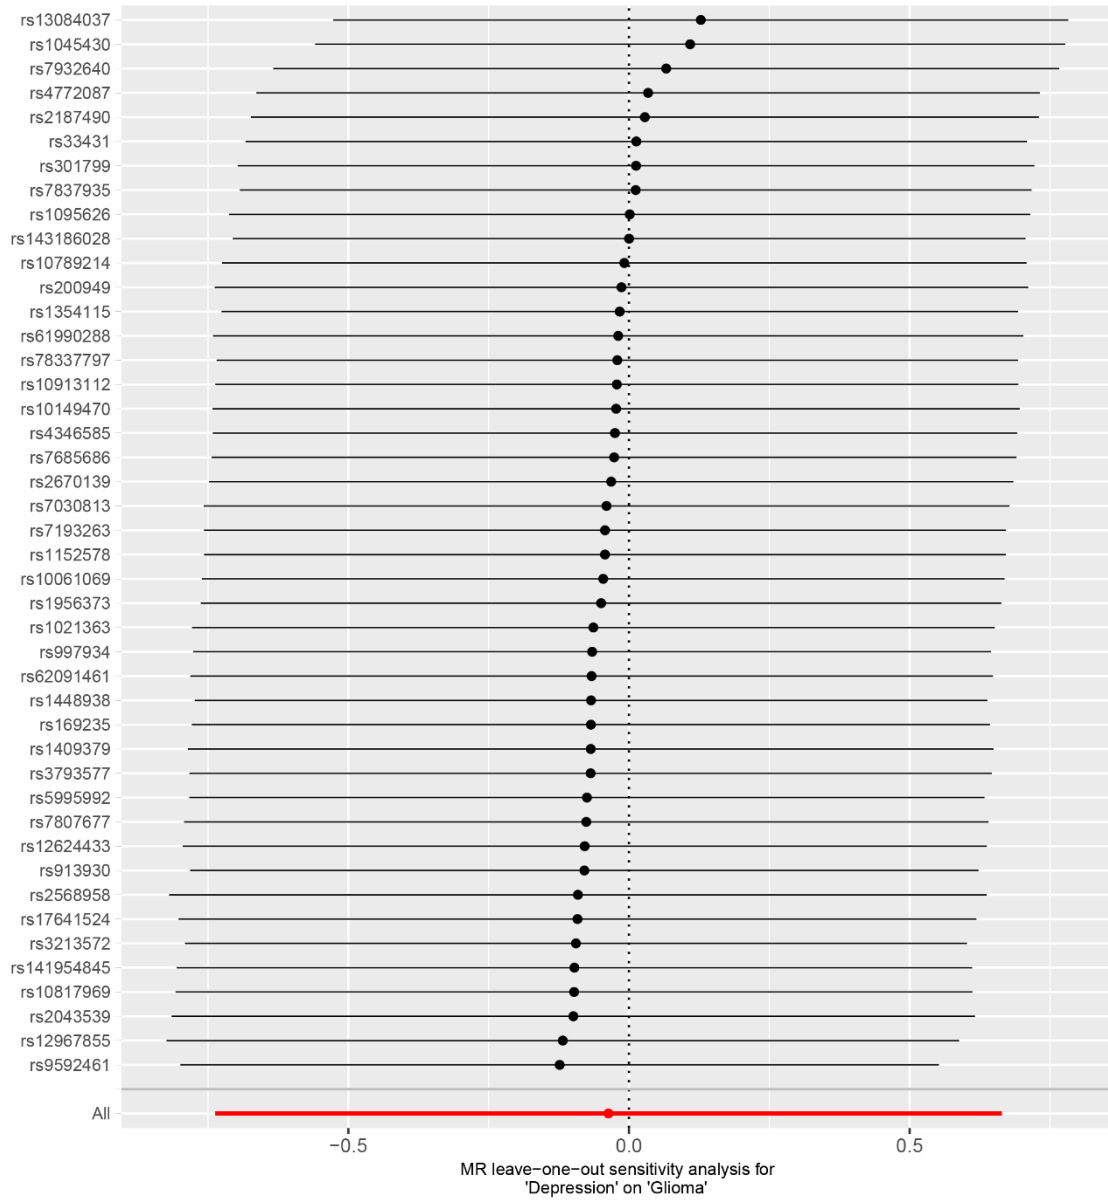

**Figure S21: Leave-one-out inverse-variance weighted mendelian randomization analyses of depression on Glioma**

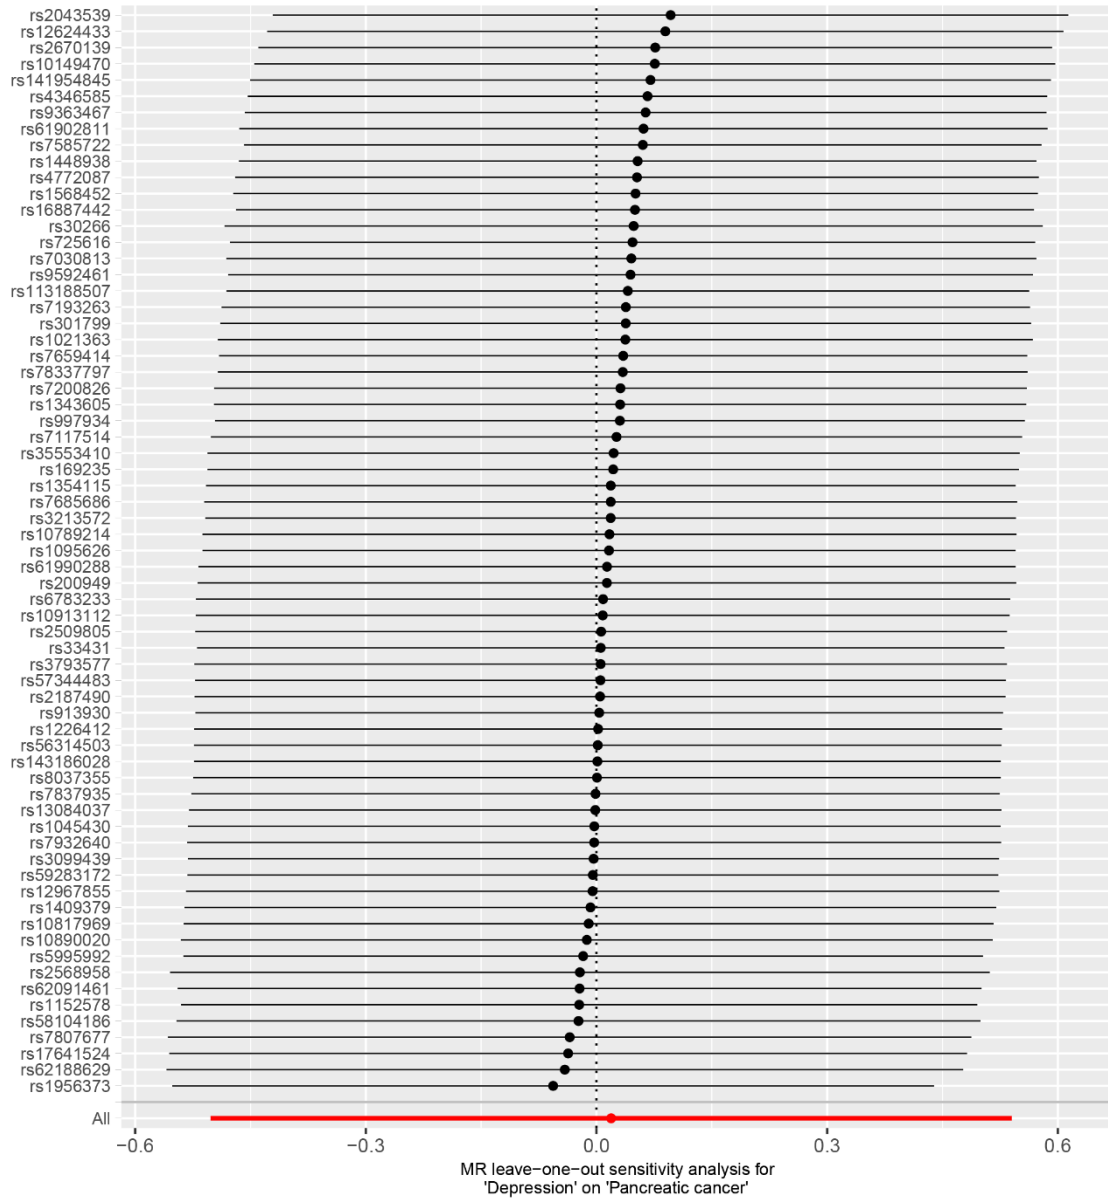

**Figure S22: Leave-one-out inverse-variance weighted mendelian randomization analyses of depression on Pancreatic cancer**

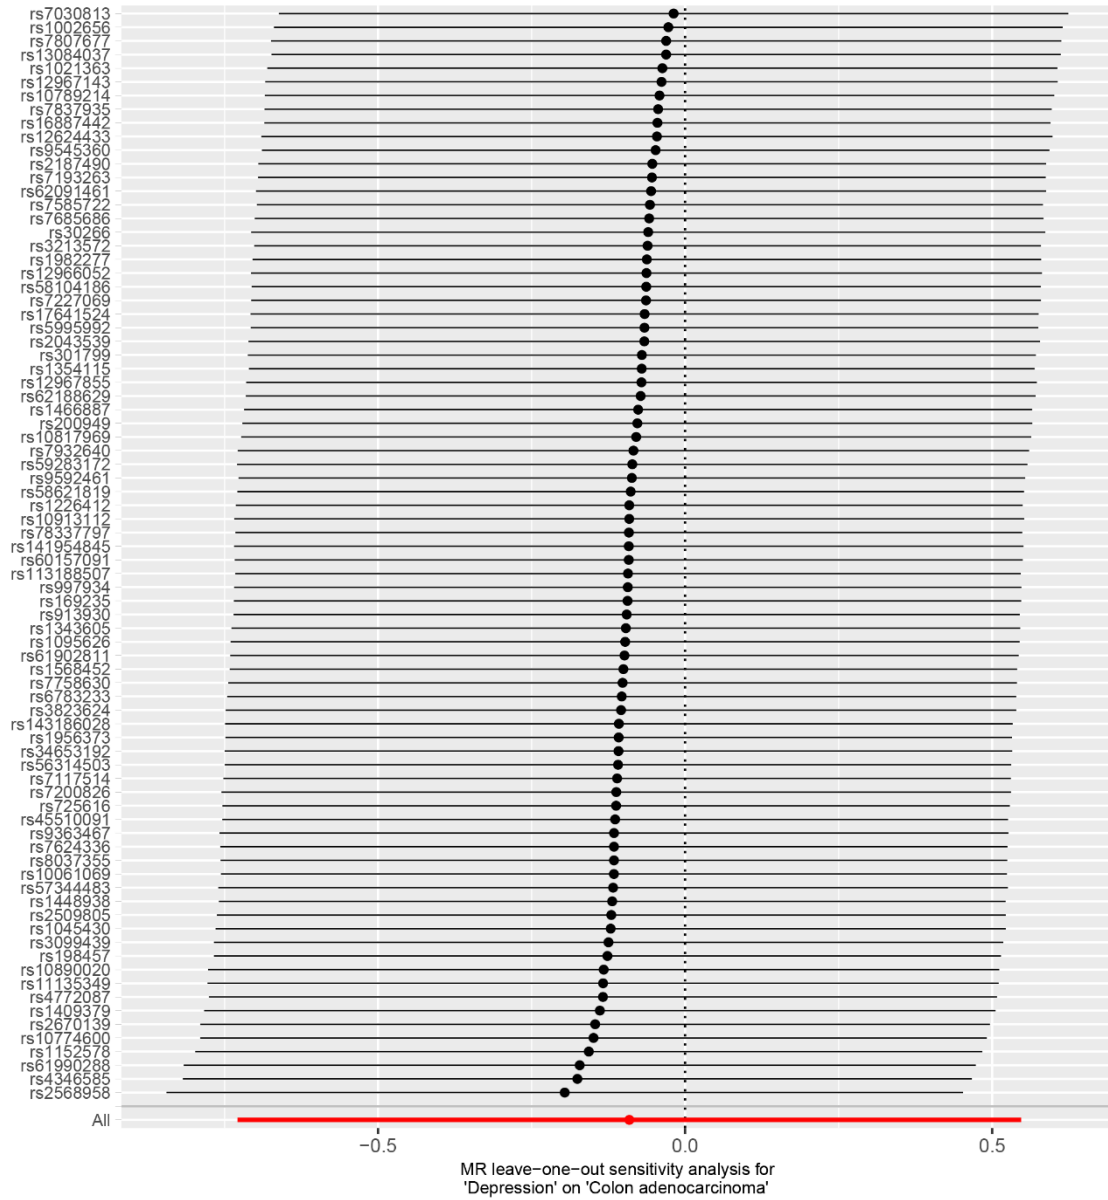

**Figure S23: Leave-one-out inverse-variance weighted mendelian randomization analyses of depression on Colon adenocarcinoma**

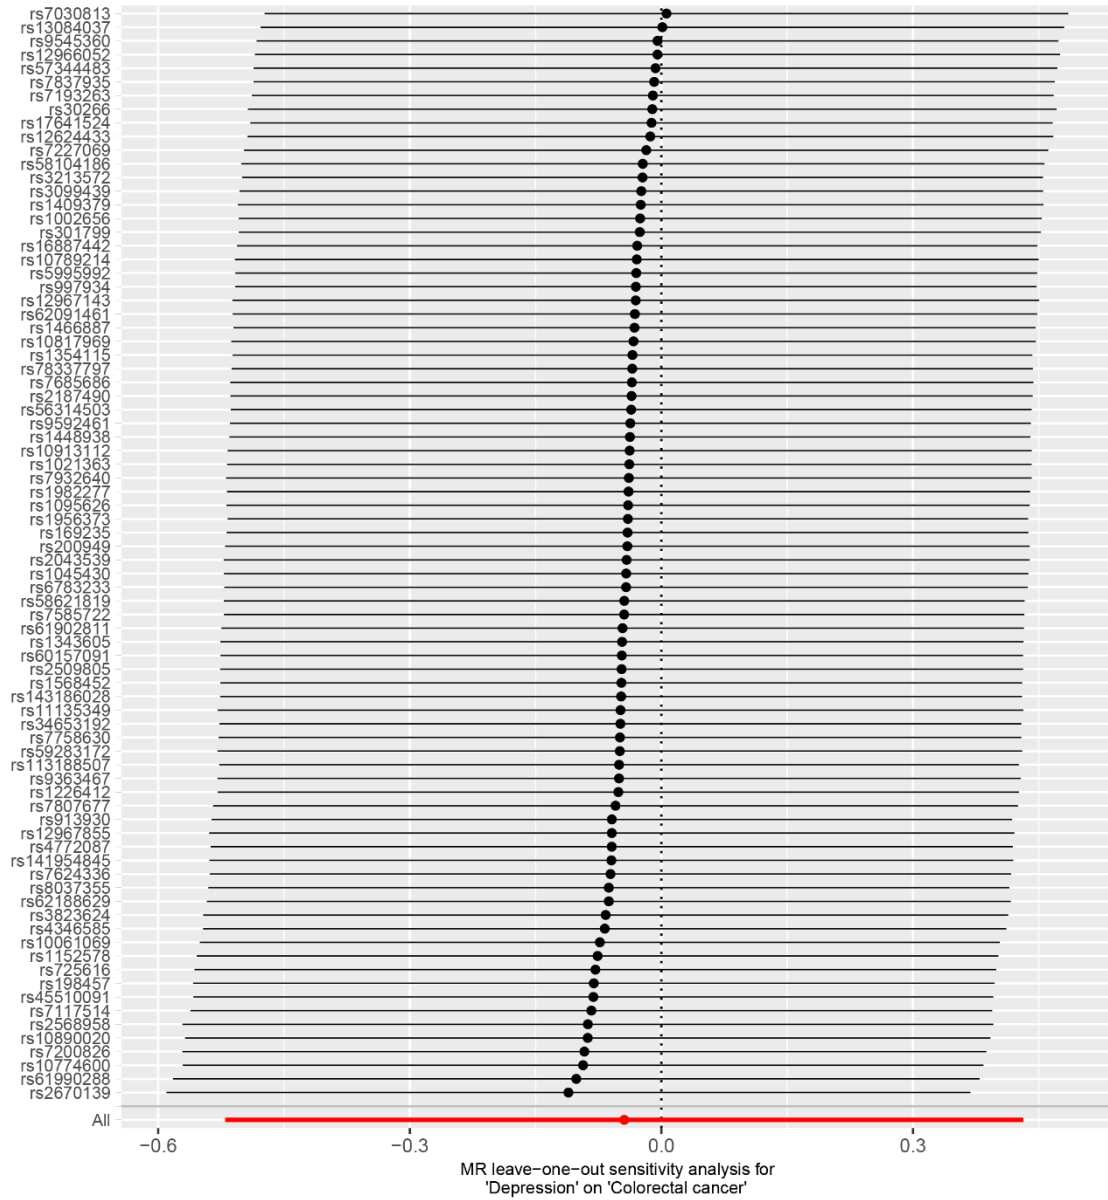

**Figure S24: Leave-one-out inverse-variance weighted mendelian randomization analyses of depression on Colorectal cancer**

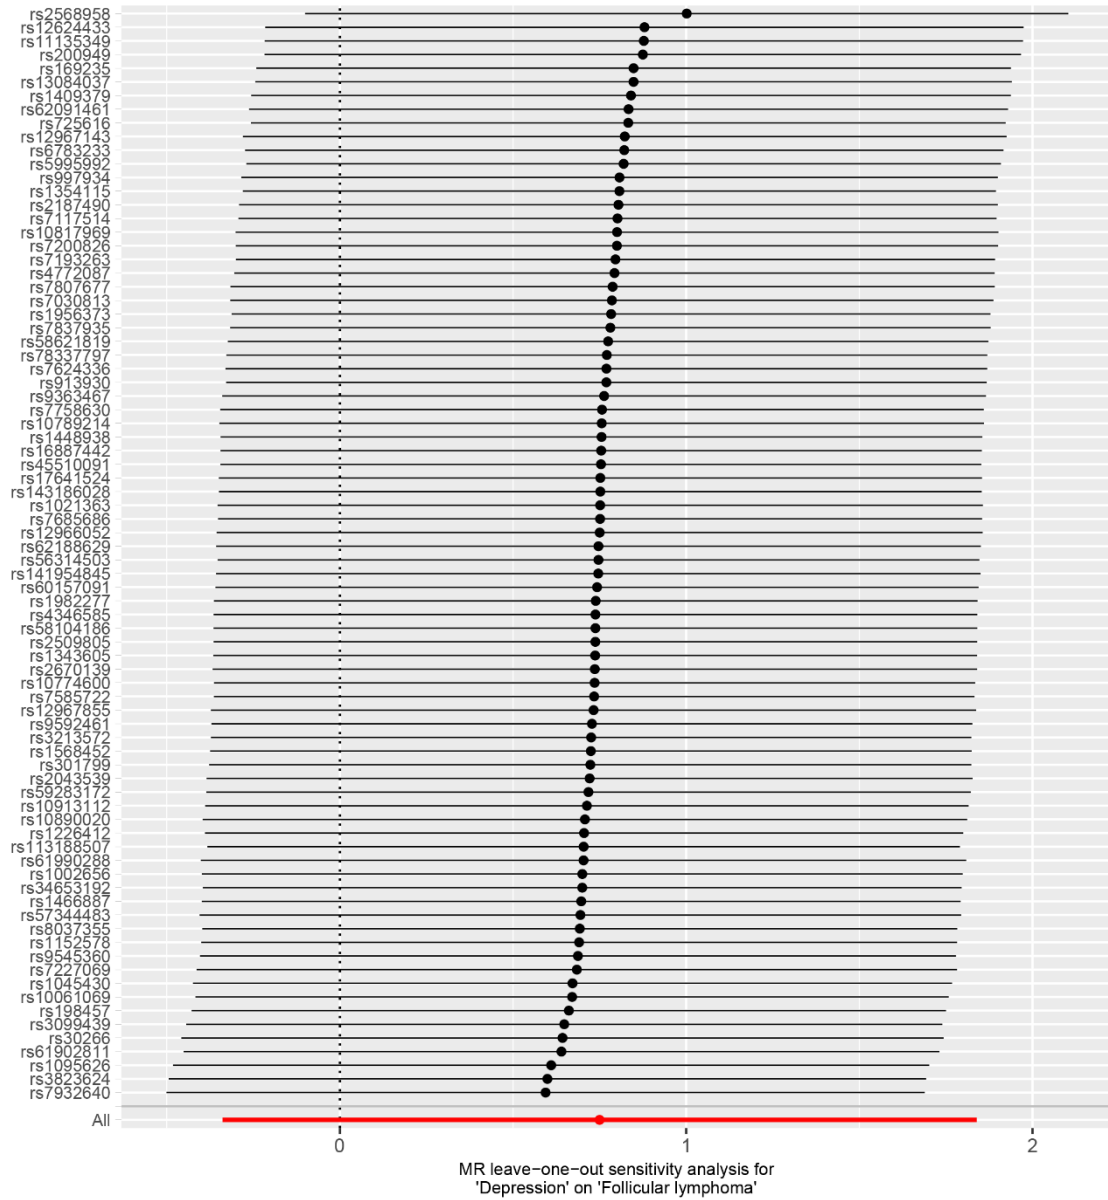

**Figure S25: Leave-one-out inverse-variance weighted mendelian randomization analyses of depression on Follicular lymphoma**

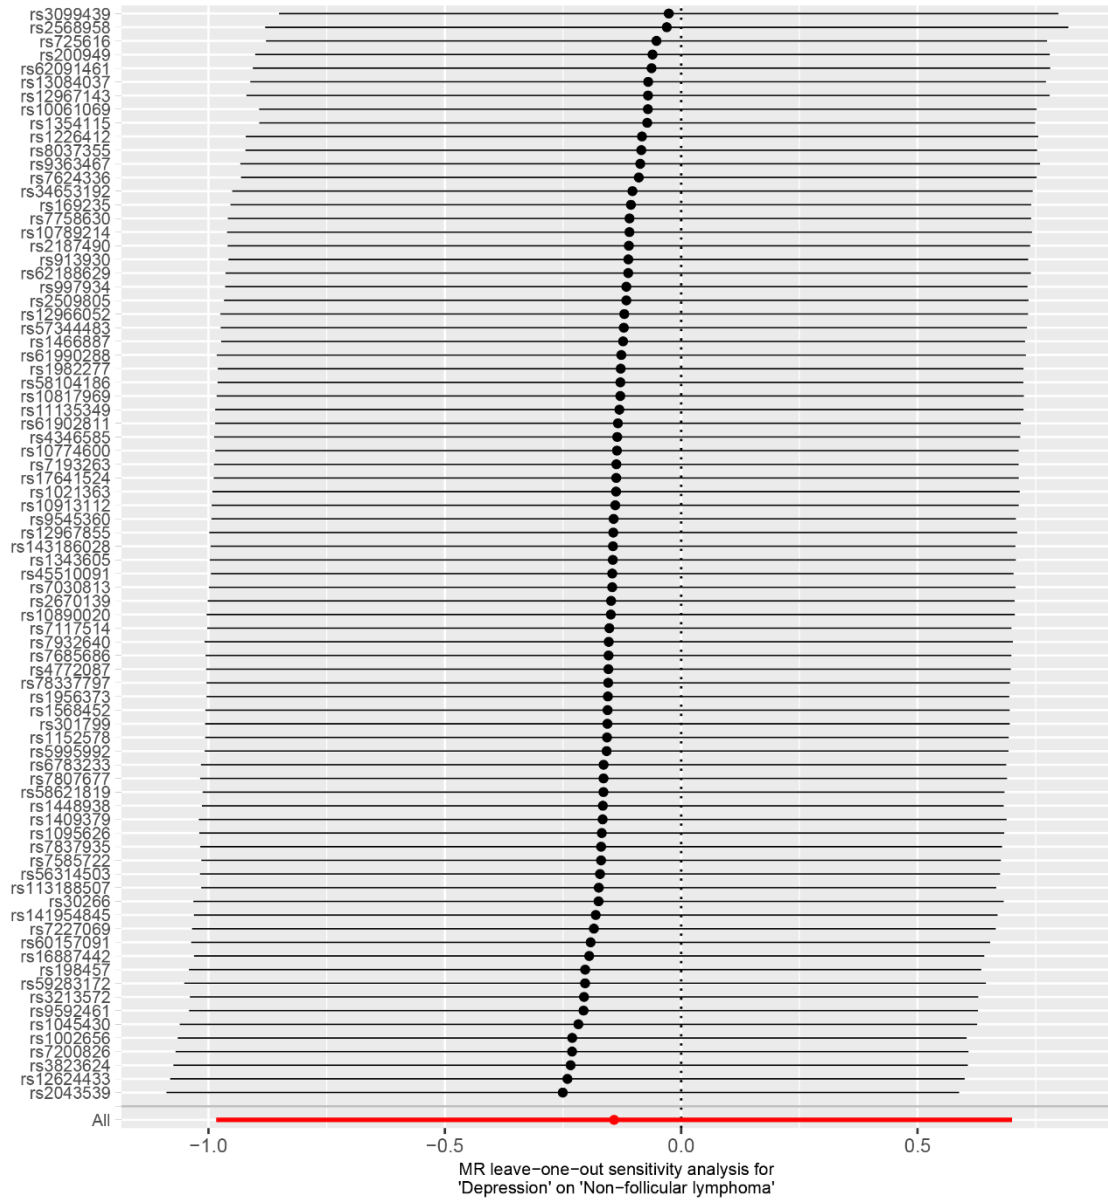

**Figure S26: Leave-one-out inverse-variance weighted mendelian randomization analyses of depression on Non-follicular lymphoma**

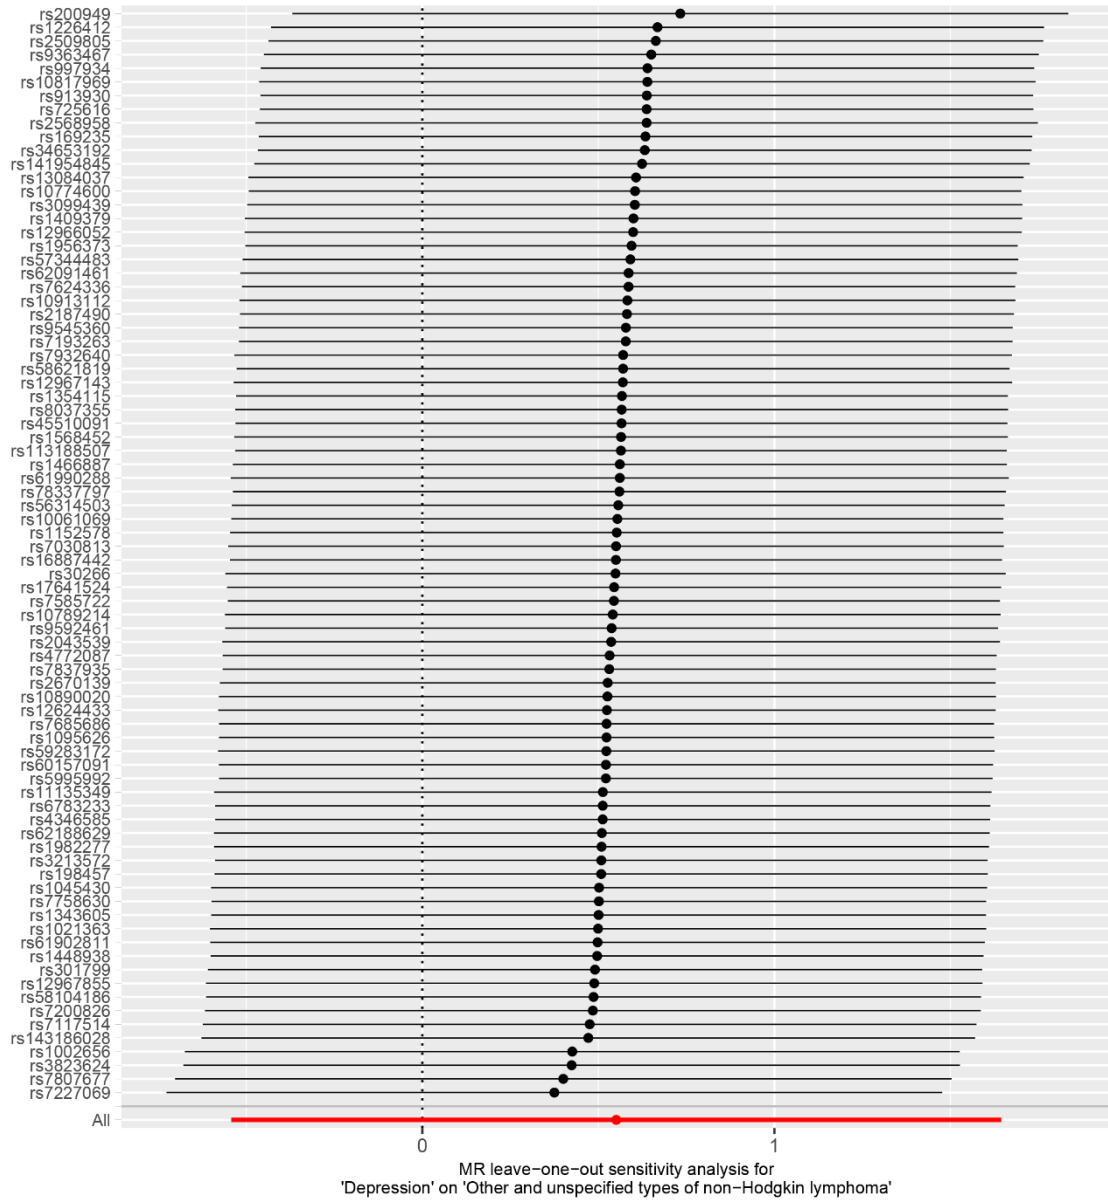

**Figure S27: Leave-one-out inverse-variance weighted mendelian randomization analyses of depression on Other and unspecified types of non-Hodgkin lymphoma**



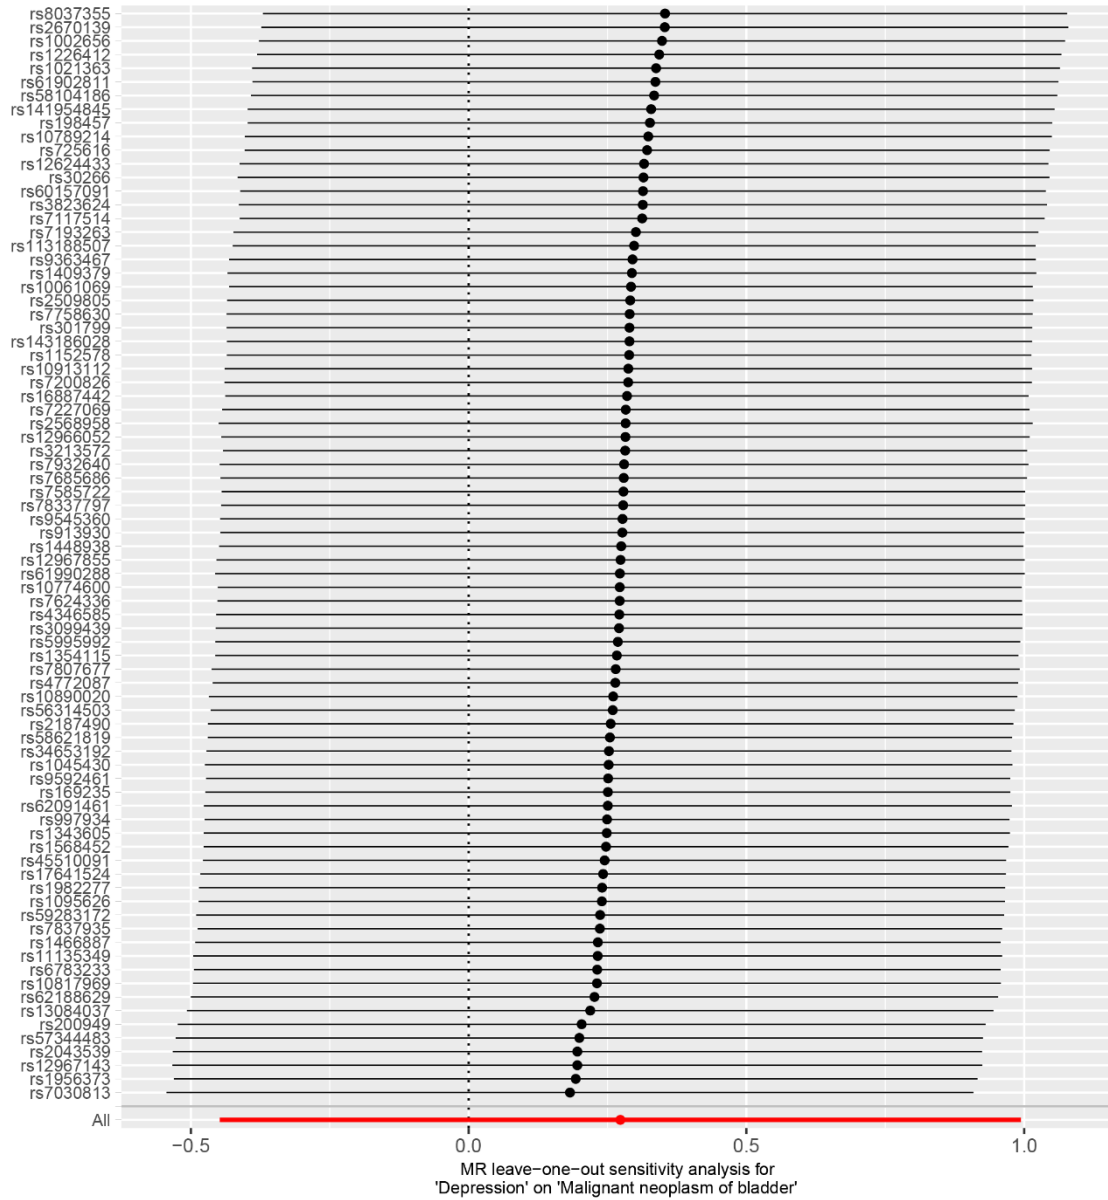

**Figure S28: Leave-one-out inverse-variance weighted mendelian randomization analyses of depression on Malignant neoplasm of bladder**

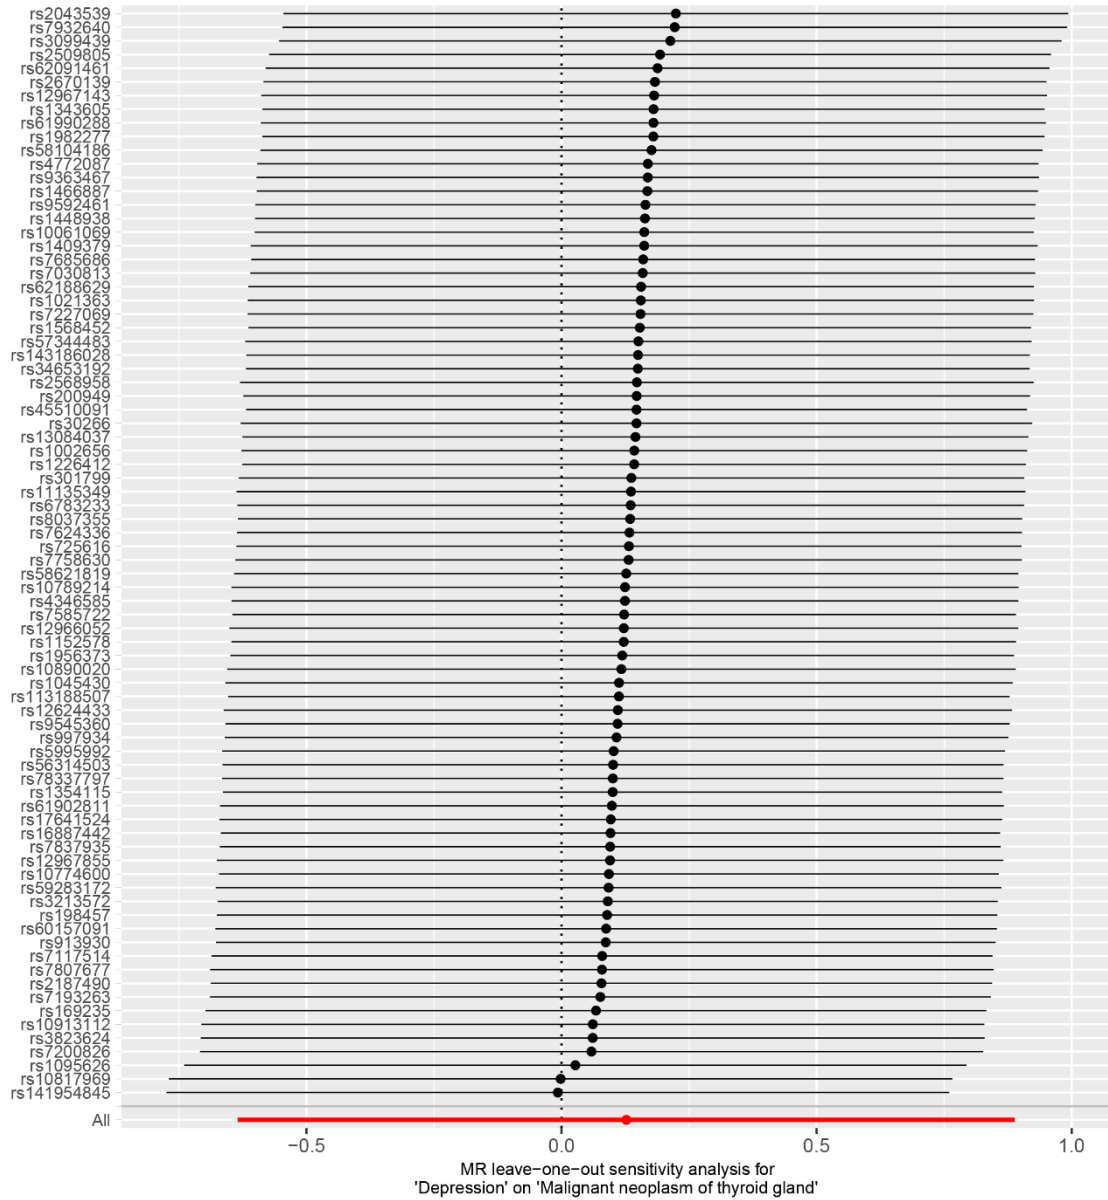

**Figure S29: Leave-one-out inverse-variance weighted mendelian randomization analyses of depression on Malignant neoplasm of thyroid gland**

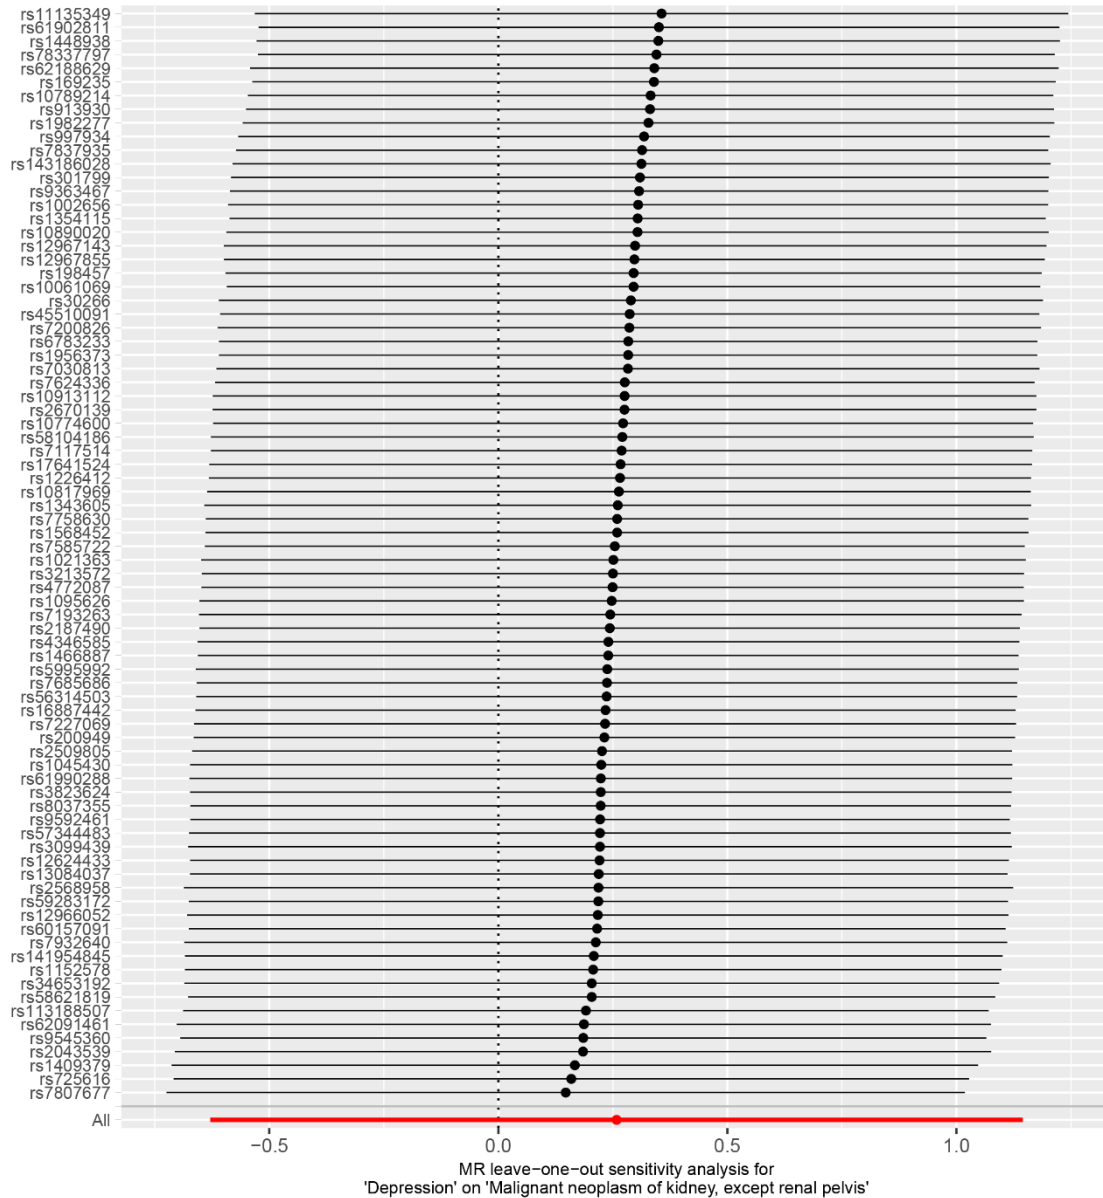

**Figure S30: Leave-one-out inverse-variance weighted mendelian randomization analyses of depression on Malignant neoplasm of kidney, except renal pelvis**

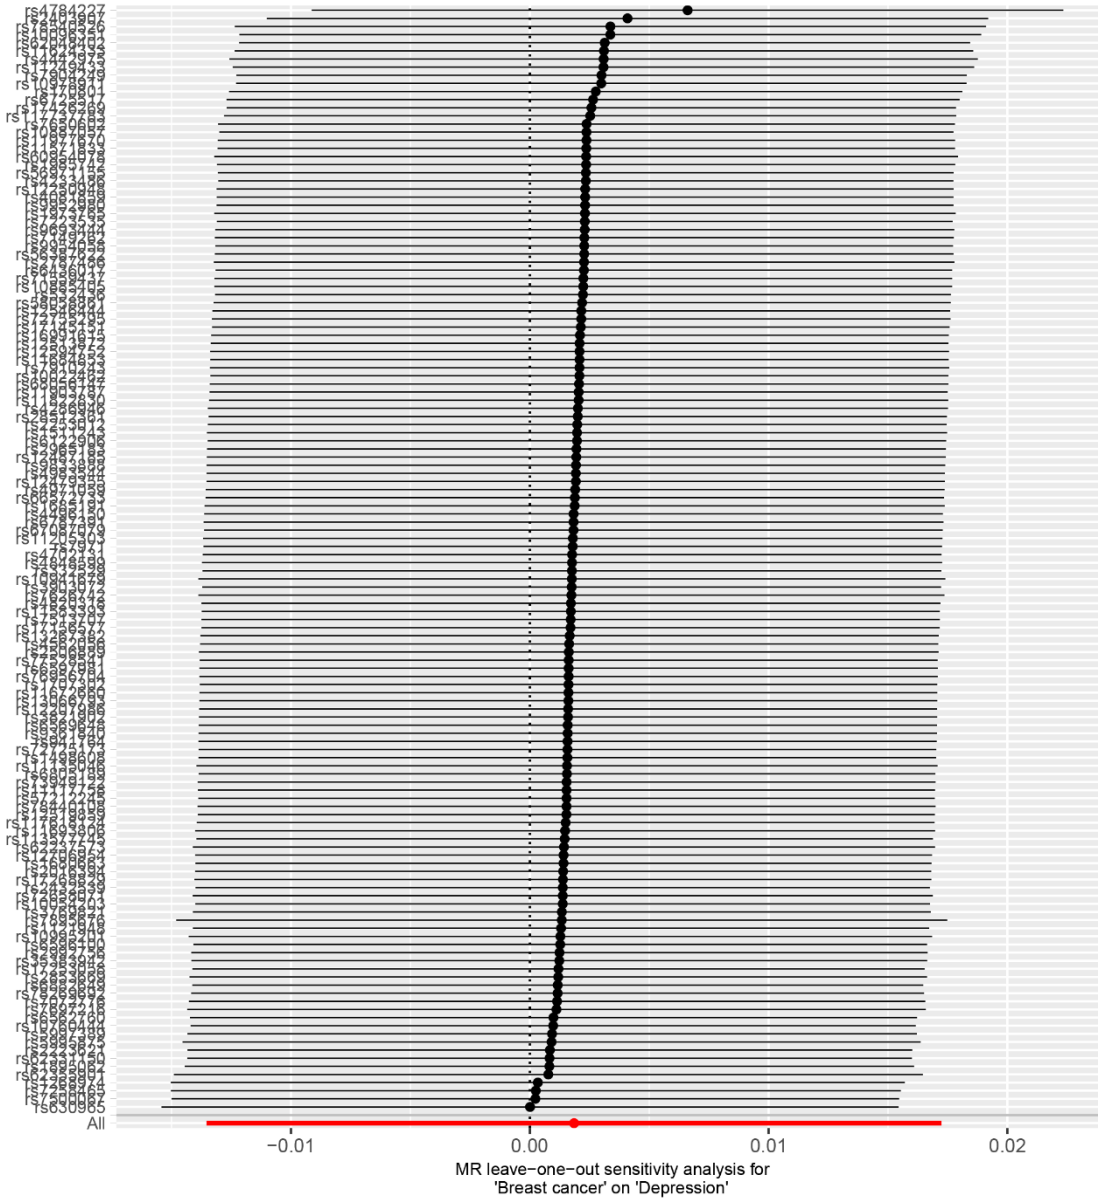

**Figure S31: Leave-one-out inverse-variance weighted mendelian randomization analyses of Breast cancer on depression**

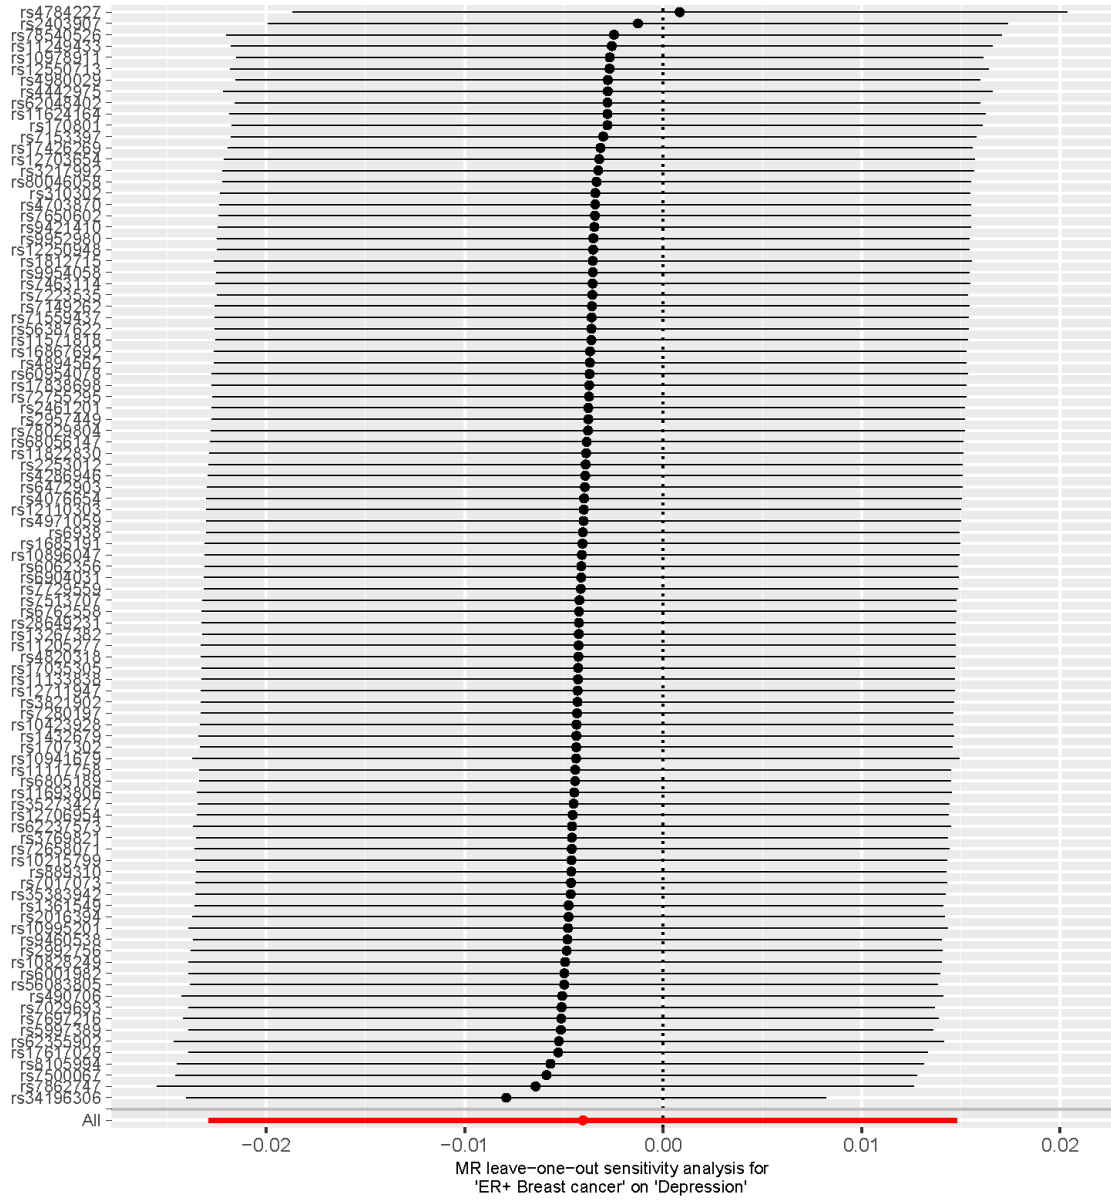

**Figure S32: Leave-one-out inverse-variance weighted mendelian randomization analyses of ER+ Breast cancer on depression**

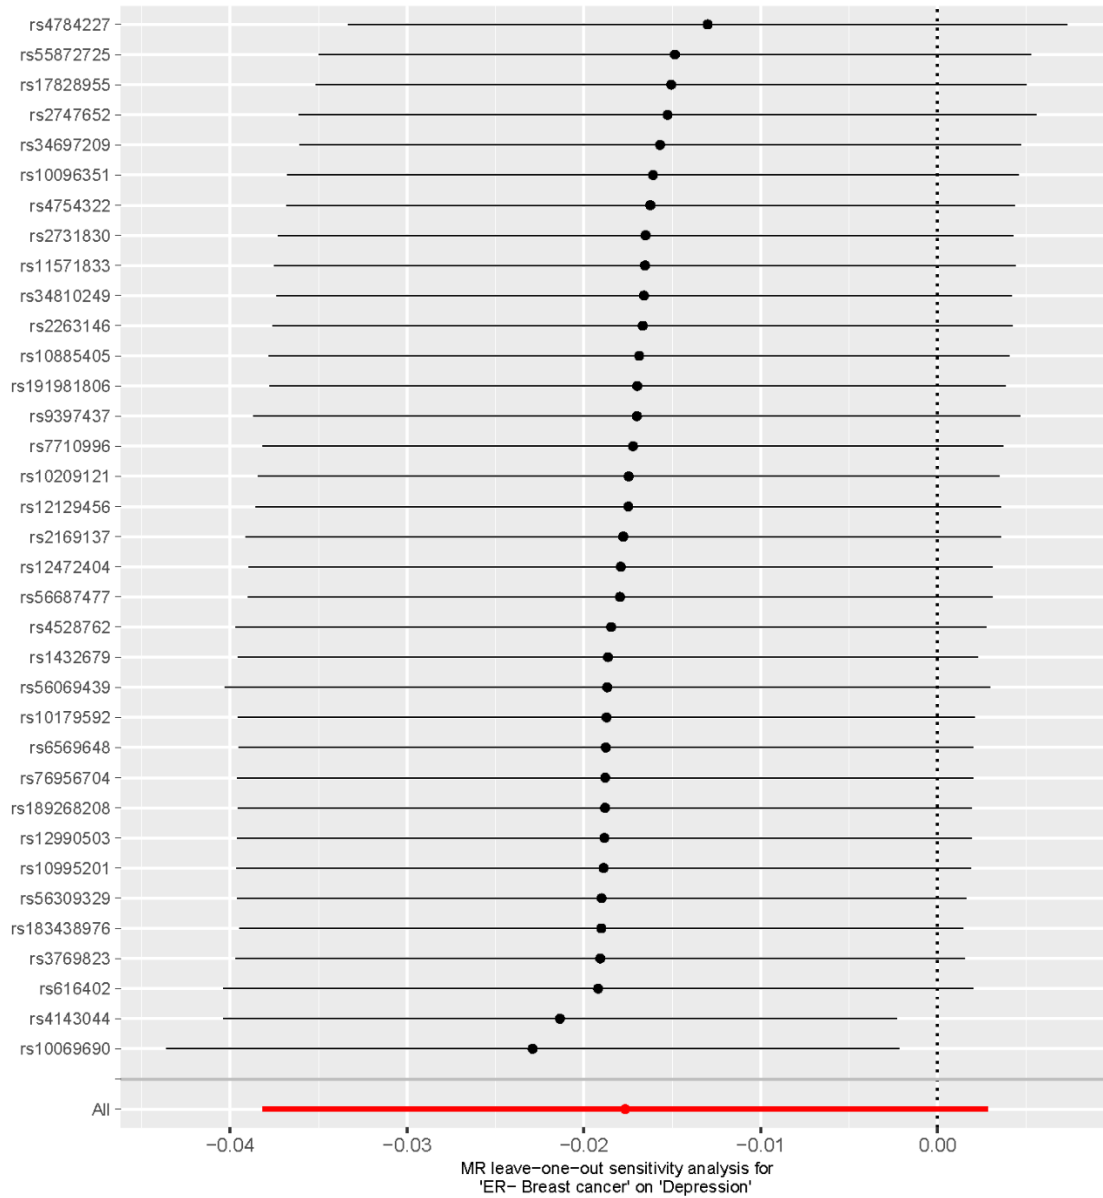

**Figure S33: Leave-one-out inverse-variance weighted mendelian randomization analyses of ER- Breast cancer on depression**

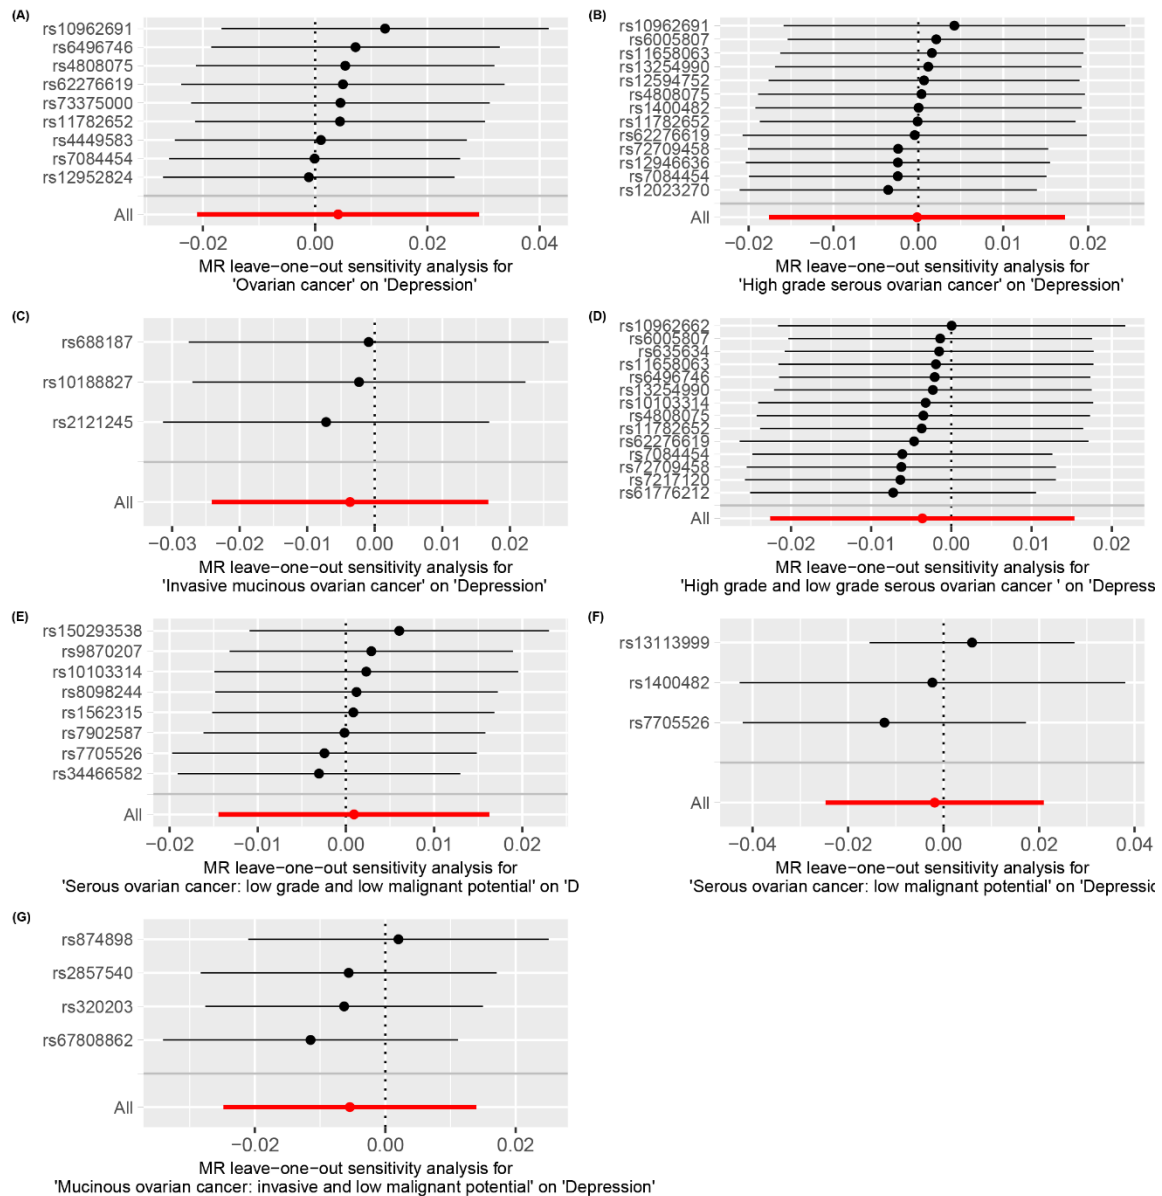

**Figure S34: Leave-one-out inverse-variance weighted mendelian randomization analyses of different types of ovarian cancer on depression:** (A) Ovarian cancer; (B) High grade serous ovarian cancer; (C) Invasive mucinous ovarian; (D) High grade and low grade serous ovarian cancer; (E) Serous ovarian cancer: low grade and low malignant potential; (F) Serous ovarian cancer low malignant potential; (G) Mucinous ovarian cancer: invasive and low malignant potential.

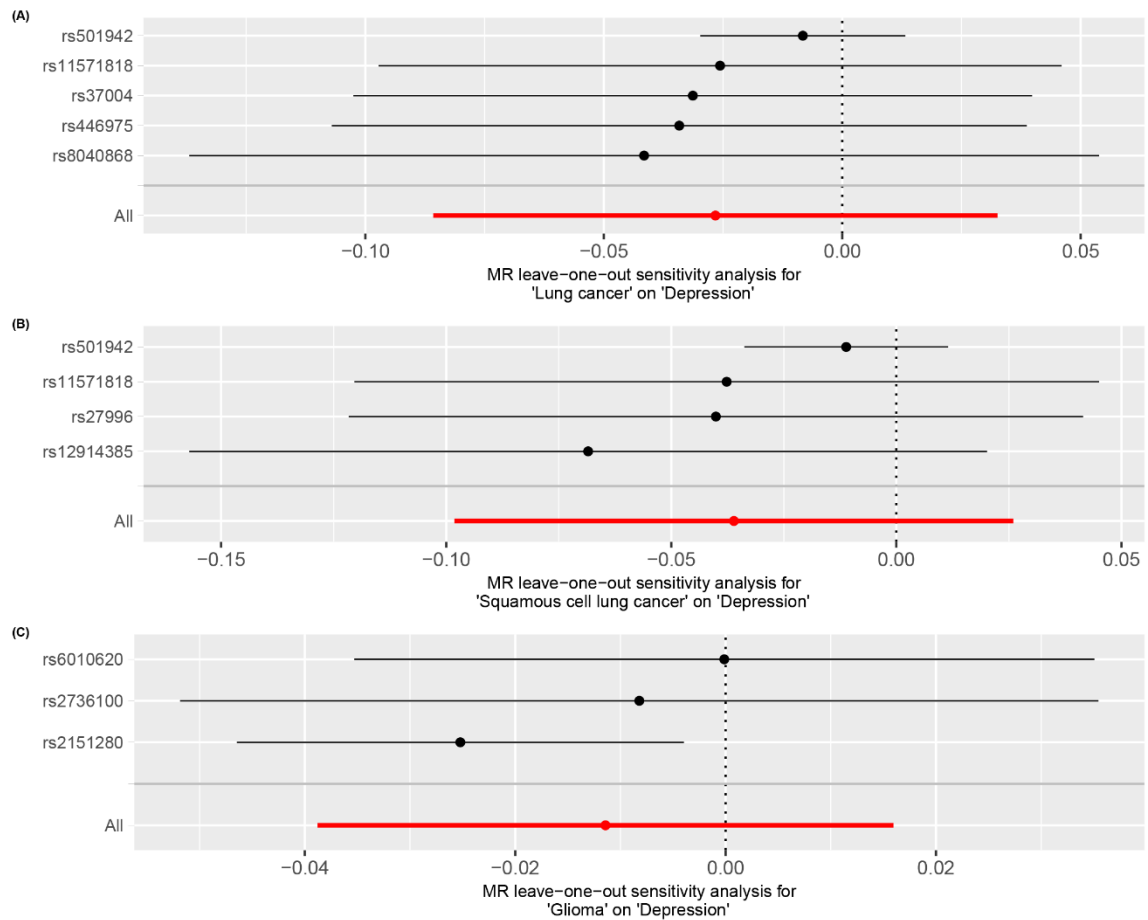

**Figure S35: Leave-one-out inverse-variance weighted mendelian randomization analyses of different types of cancer on depression: (A) Lung cancer; (B) Squamous cell lung cancer; (C) Glioma.**
